# Supplementary material for: HIF1α stabilization in hypoxia is not oxidant-initiated
Source: eLife journal article supplement (doi:10.7554/elife.72873), 2021-10-01
Supplement: fig2-figsupp1-data1 [file Figure S1 - source data 1.pdf › Figure S1 - source data 1/Figure S1 - source data 1.pdf]

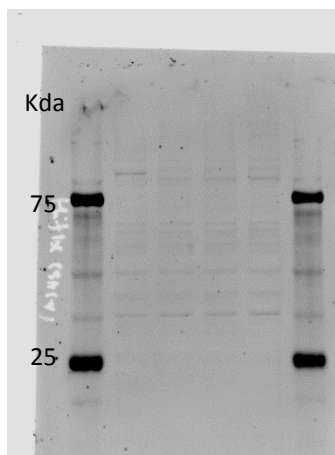

← Anti-HIF1α

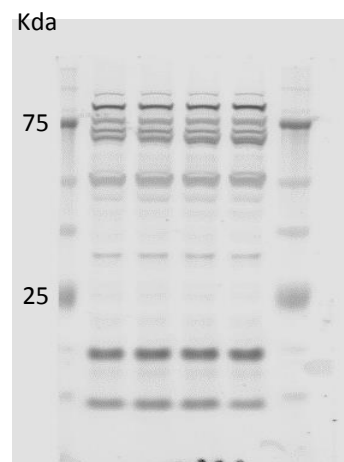

← Anti-GPX1

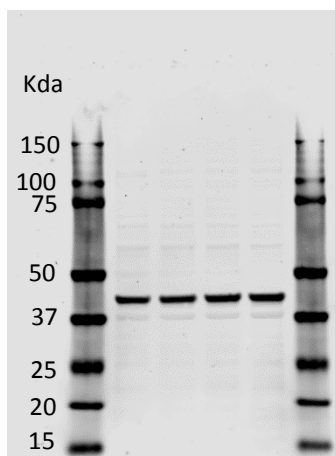

← Anti-Actin  
(Loading control  
of HIF1α blot)

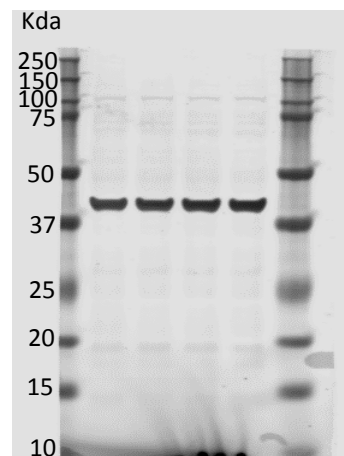

← Anti-Actin  
(Loading control  
of GPX1 blot)

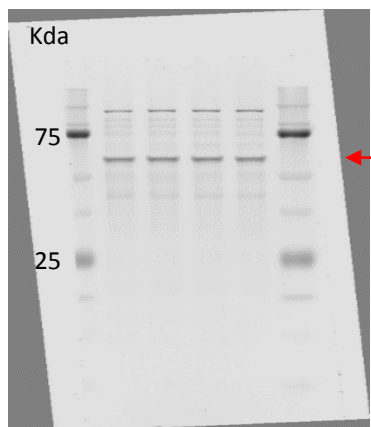

← Anti-Catalase

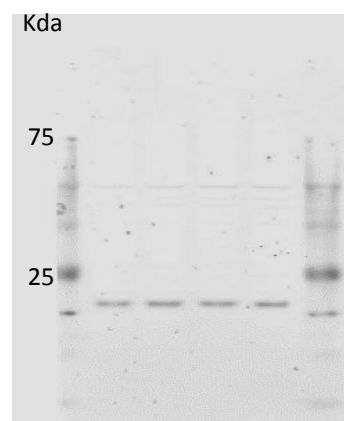

← Anti-GPX4

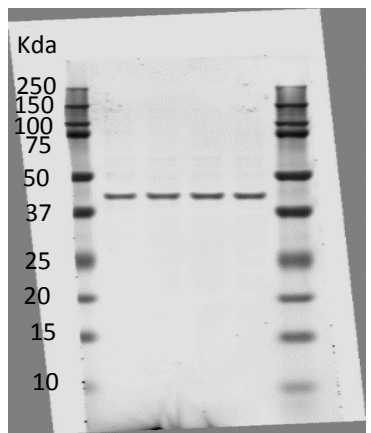

← Anti-Actin  
(Loading control  
of catalase blot)

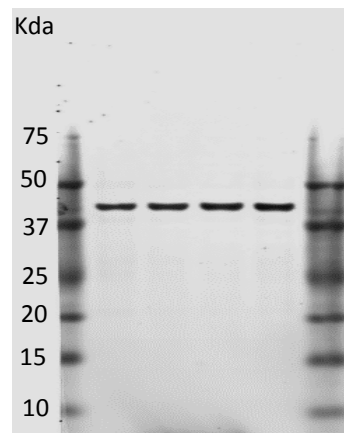

← Anti-Actin  
(Loading control  
of GPX4 blot)

Time of Hypoxic  
Exposure (Hours)

|   |   |   |   |
|---|---|---|---|
| 0 | 2 | 4 | 8 |
|---|---|---|---|

Time of Hypoxic  
Exposure (Hours)

|   |   |   |   |
|---|---|---|---|
| 0 | 2 | 4 | 8 |
|---|---|---|---|

**Figure S1A**

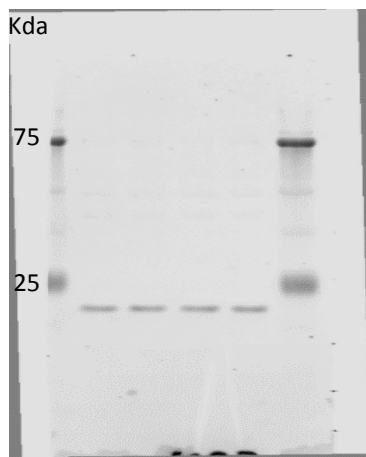

← Anti-MnSOD

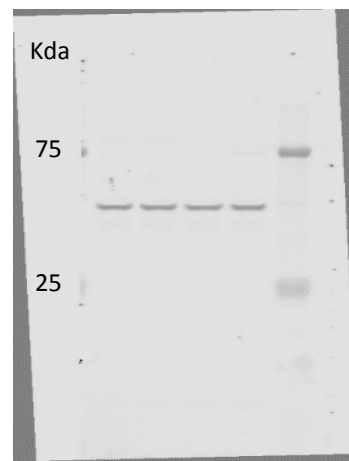

← Anti-Citrate Synthase

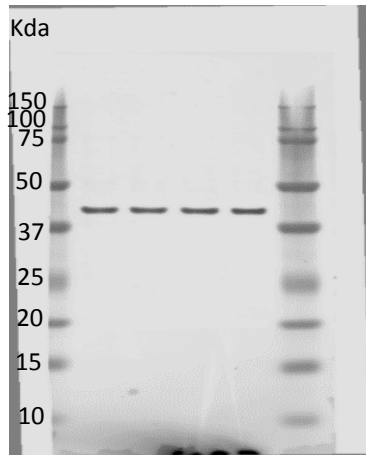

← Anti-Actin  
(Loading control  
of MnSOD blot)

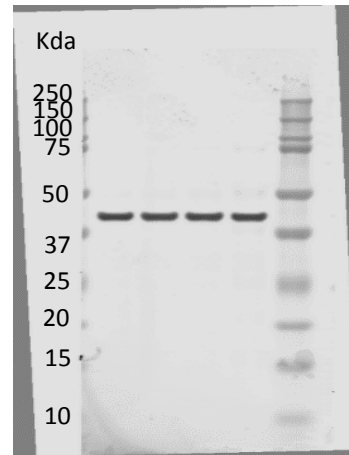

← Anti-Actin  
(Loading control  
of Citrate  
Synthase blot)

Time of Hypoxic  
Exposure (Hours)

|   |   |   |   |
|---|---|---|---|
| 0 | 2 | 4 | 8 |
|---|---|---|---|

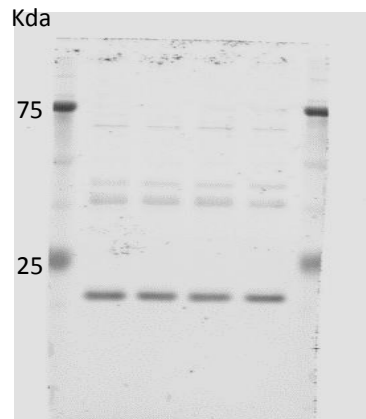

← Anti-Prdx3

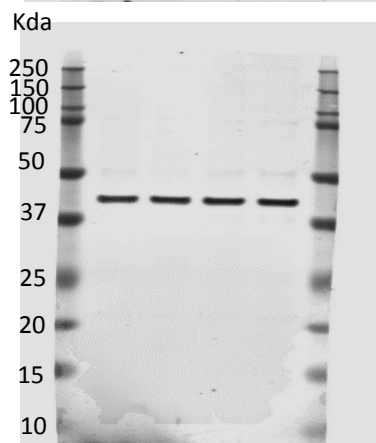

← Anti-Actin  
(Loading control  
of Prdx3 blot)

Time of Hypoxic  
Exposure (Hours)

|   |   |   |   |
|---|---|---|---|
| 0 | 2 | 4 | 8 |
|---|---|---|---|

**Figure S1B**
