# Supplementary figures and images for: HIF1α stabilization in hypoxia is not oxidant-initiated
Source: eLife journal article supplement (doi:10.7554/elife.72873), 2021-10-01

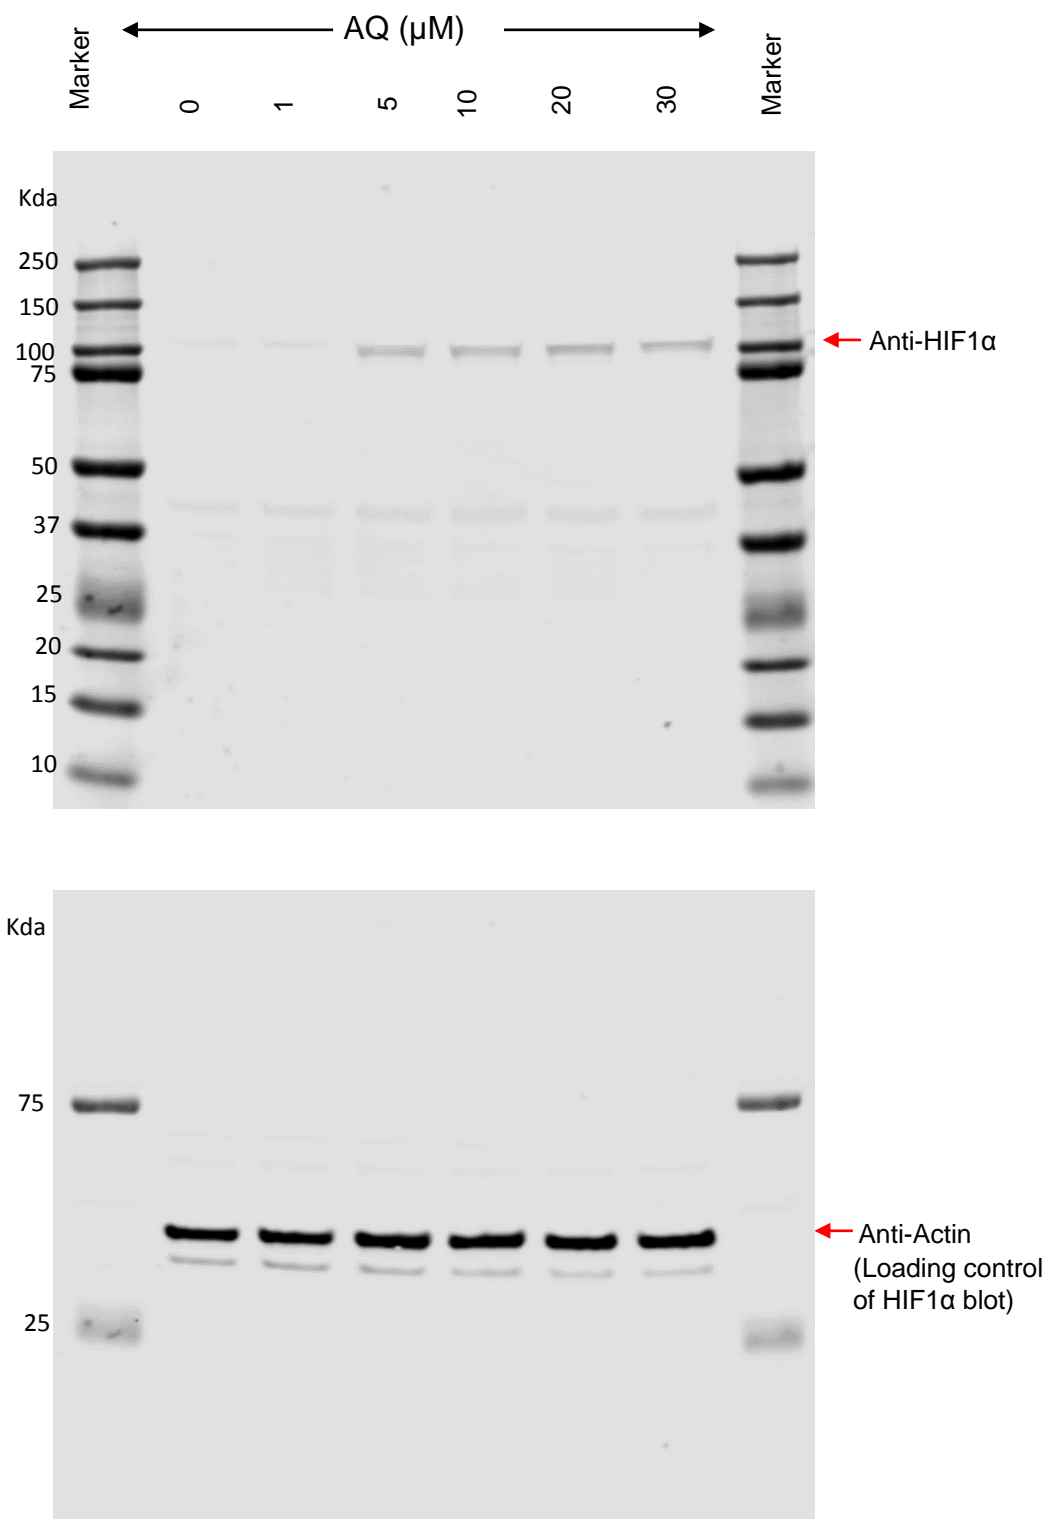

**Figure 1A**

Supplement: fig1-data1 [file elife-72873-fig1-data1-v2.zip]

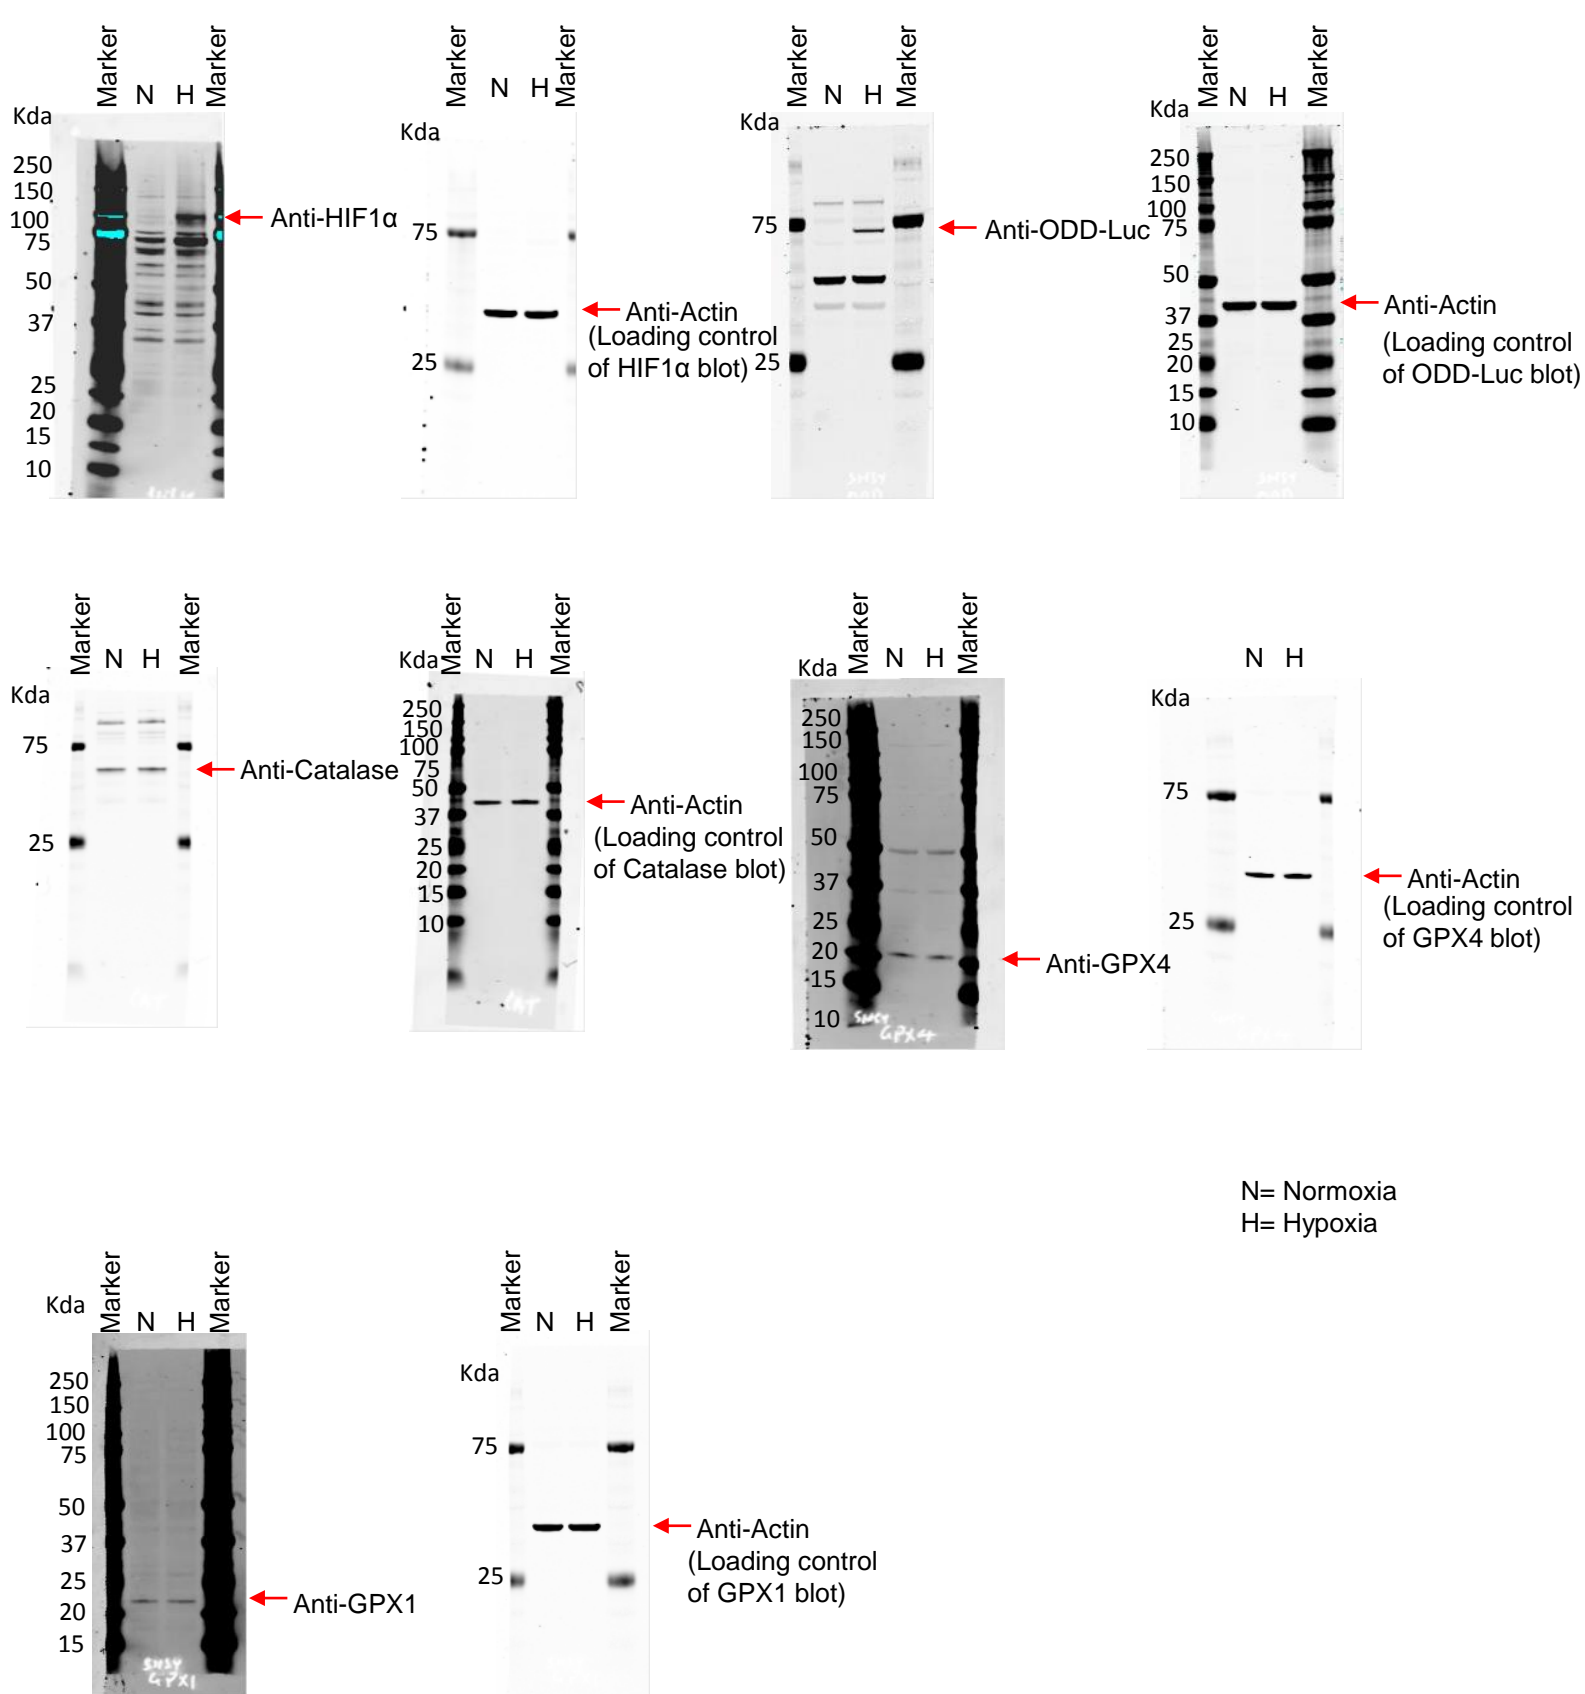

**Figure 2A**

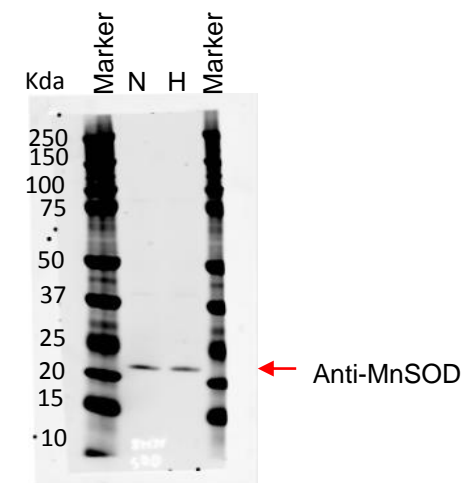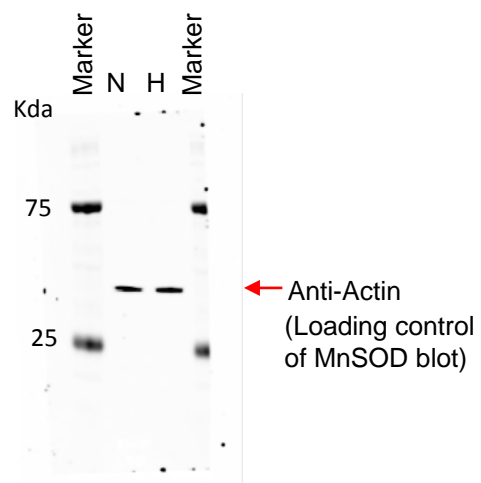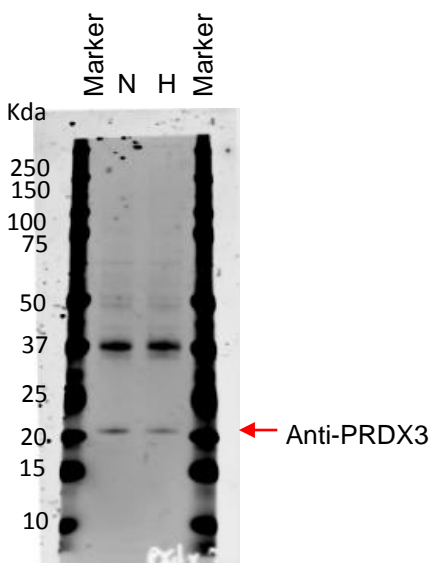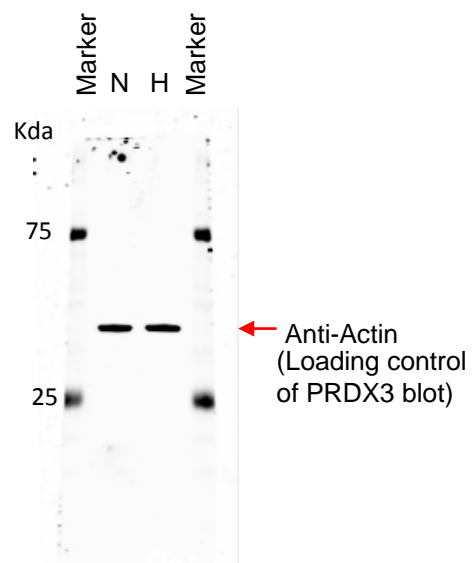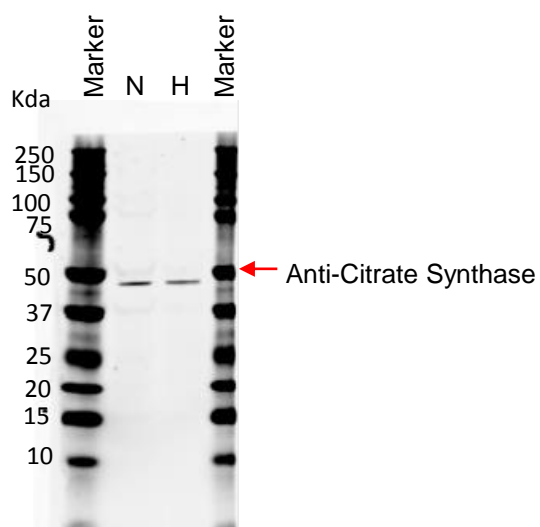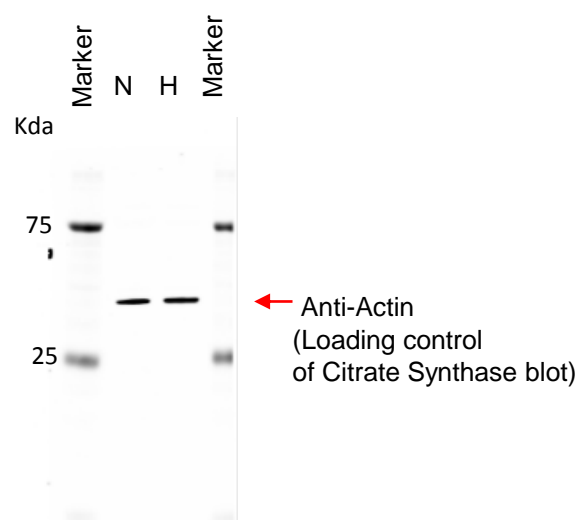

N= Normoxia  
H= Hypoxia

**Figure 2D**

Supplement: fig2-data1 [file Figure 2 - source data 1.pdf › Figure 2 - source data 1/Figure 2 - source data 1.pdf]

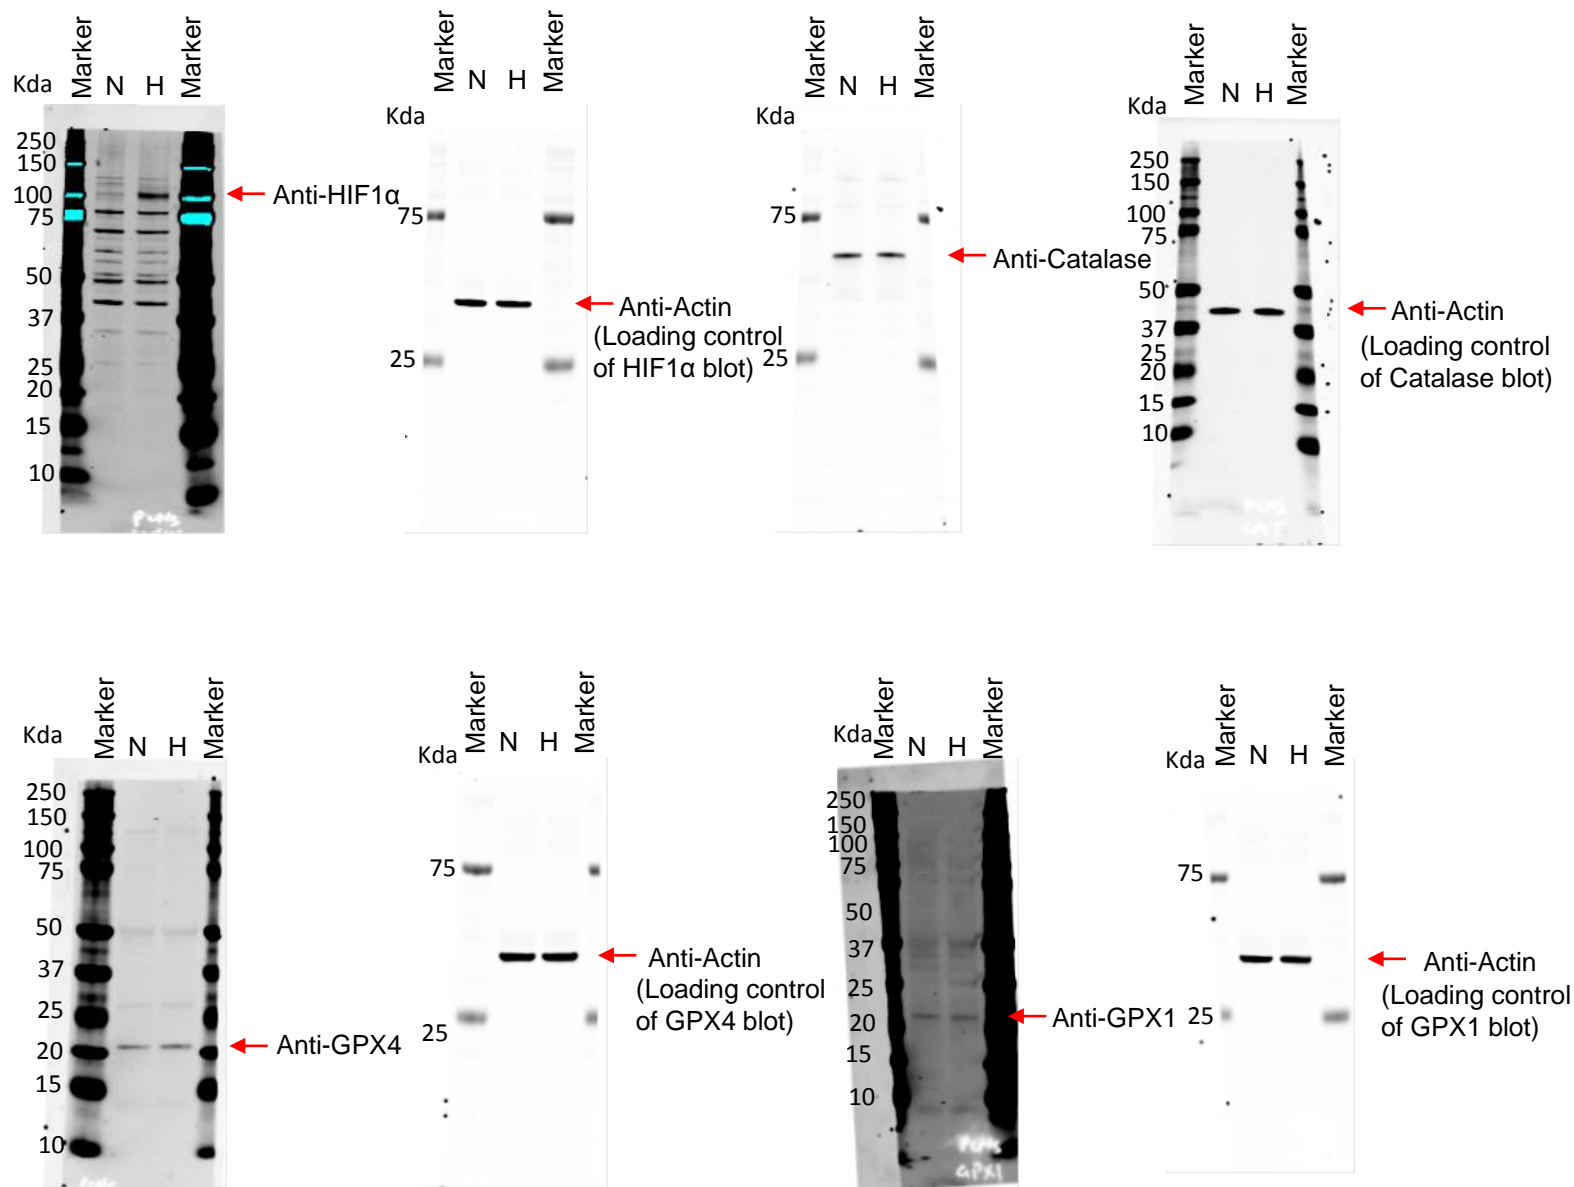

**Figure 2F**

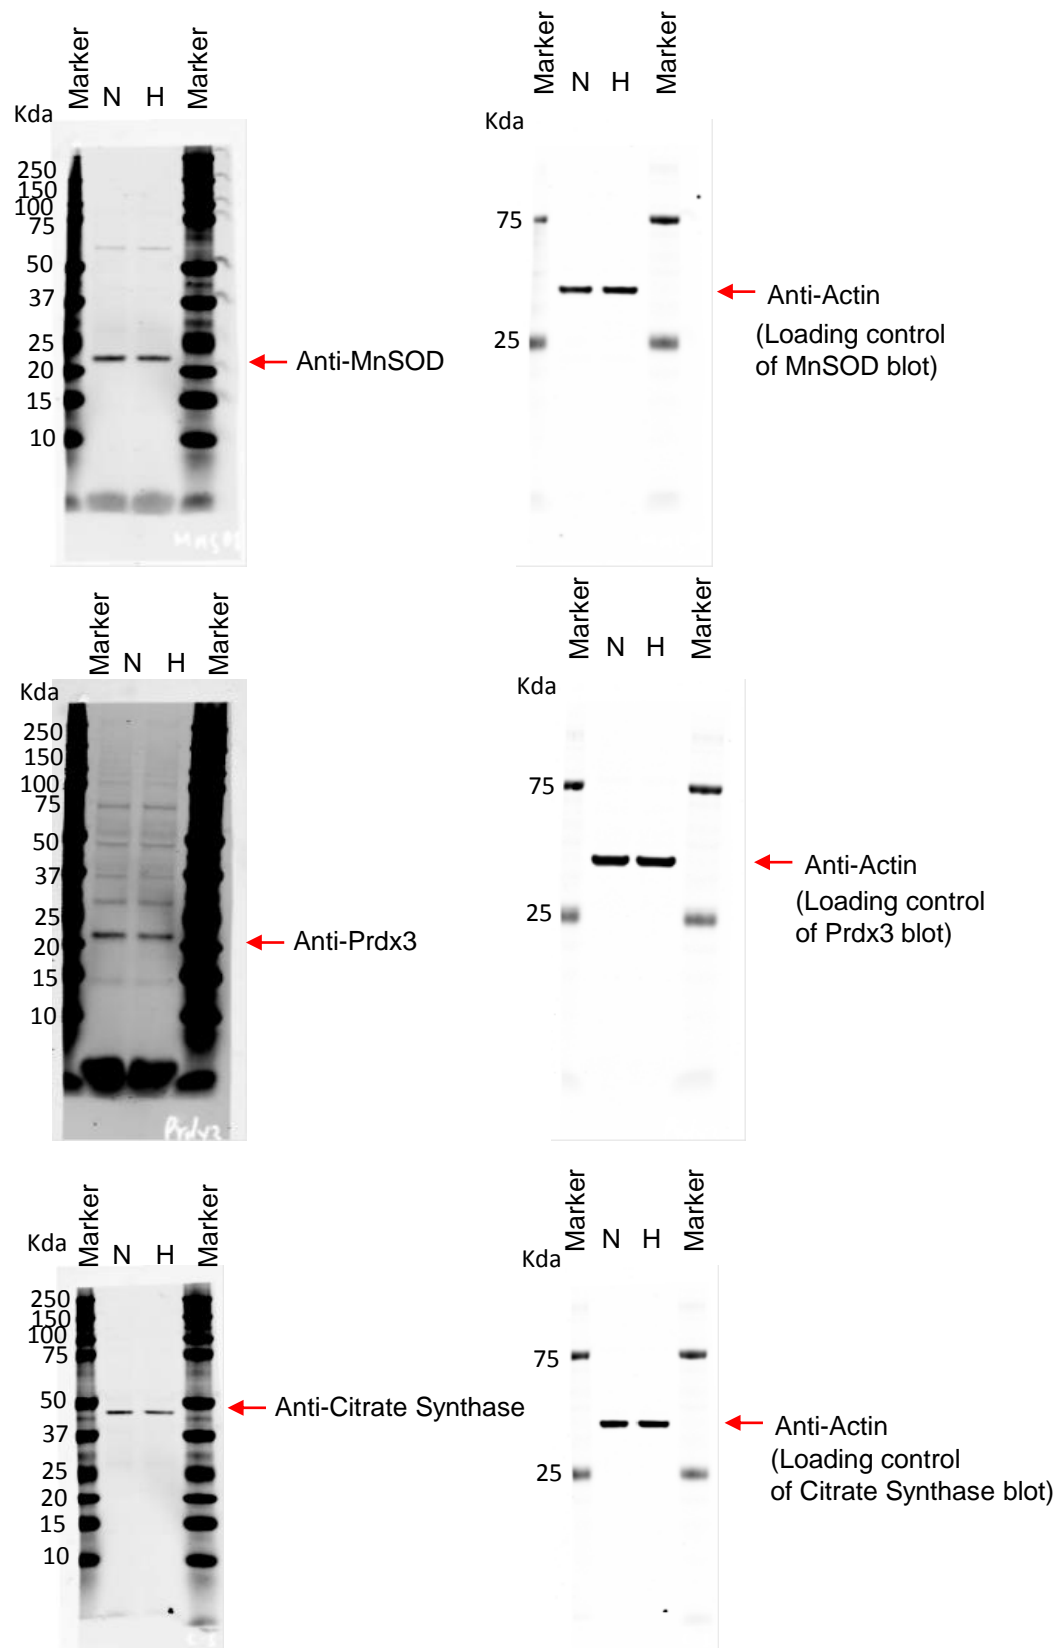

**Figure 2H**

Supplement: fig2-data2 [file elife-72873-fig2-data2-v2.zip]

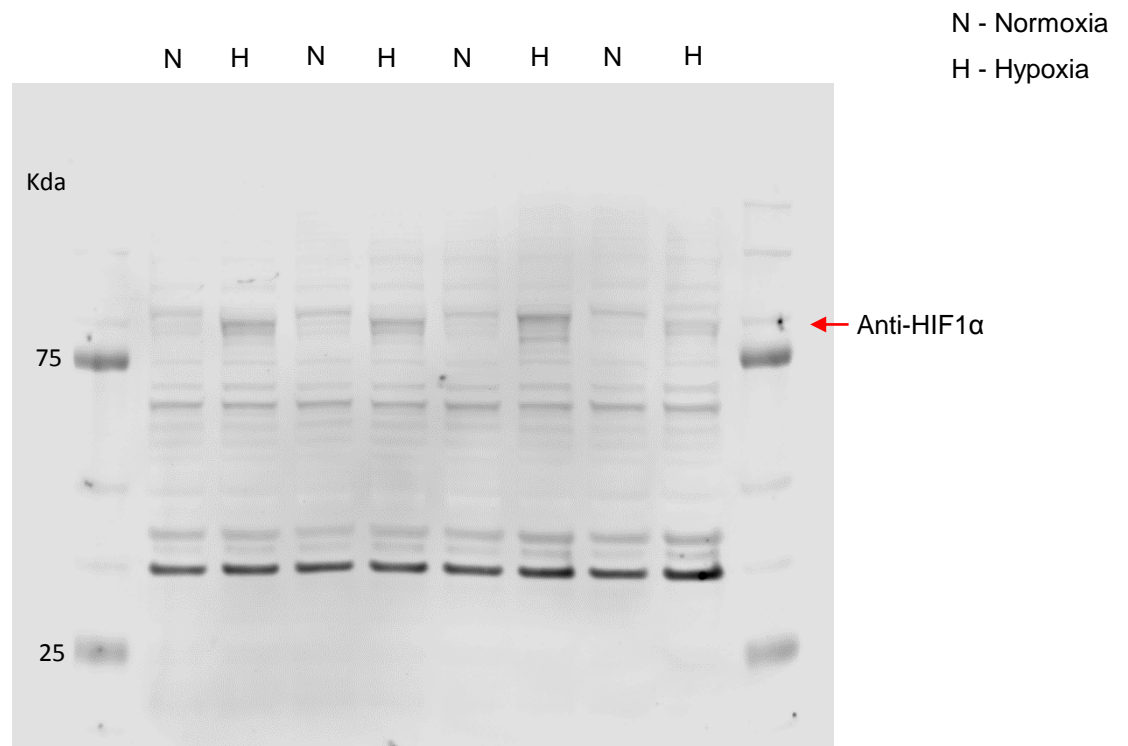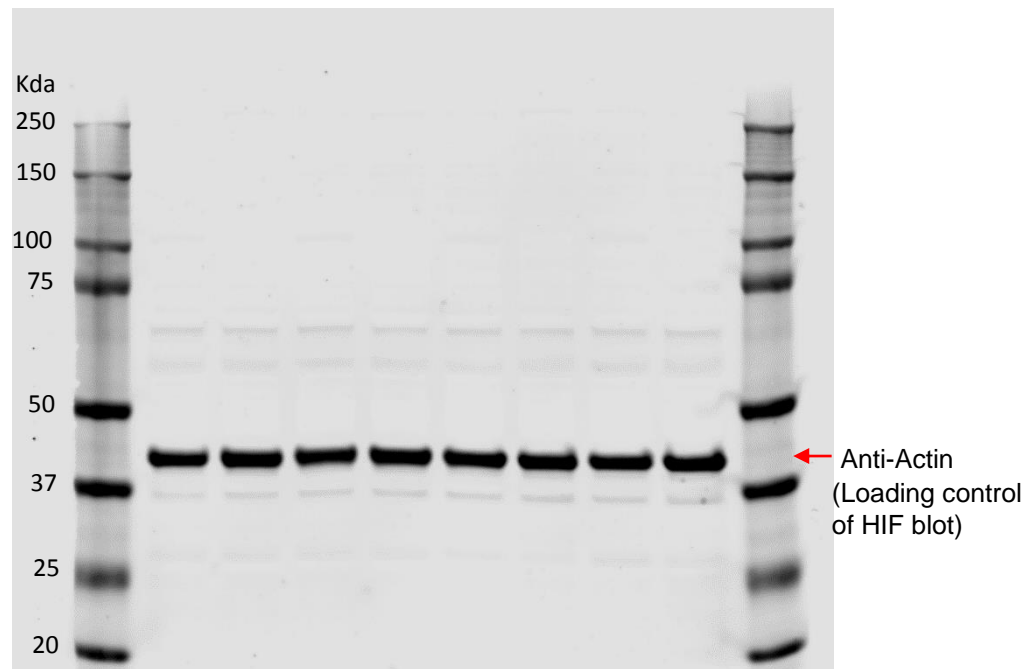

|          |   |   |   |   |   |   |   |   |
|----------|---|---|---|---|---|---|---|---|
| GFP      | + | + | - | - | - | - | - | - |
| MnSOD    | - | - | + | + | - | - | - | - |
| Catalase | - | - | - | - | + | + | - | - |
| GPX1     | - | - | - | - | - | - | + | + |

**Figure 3C**

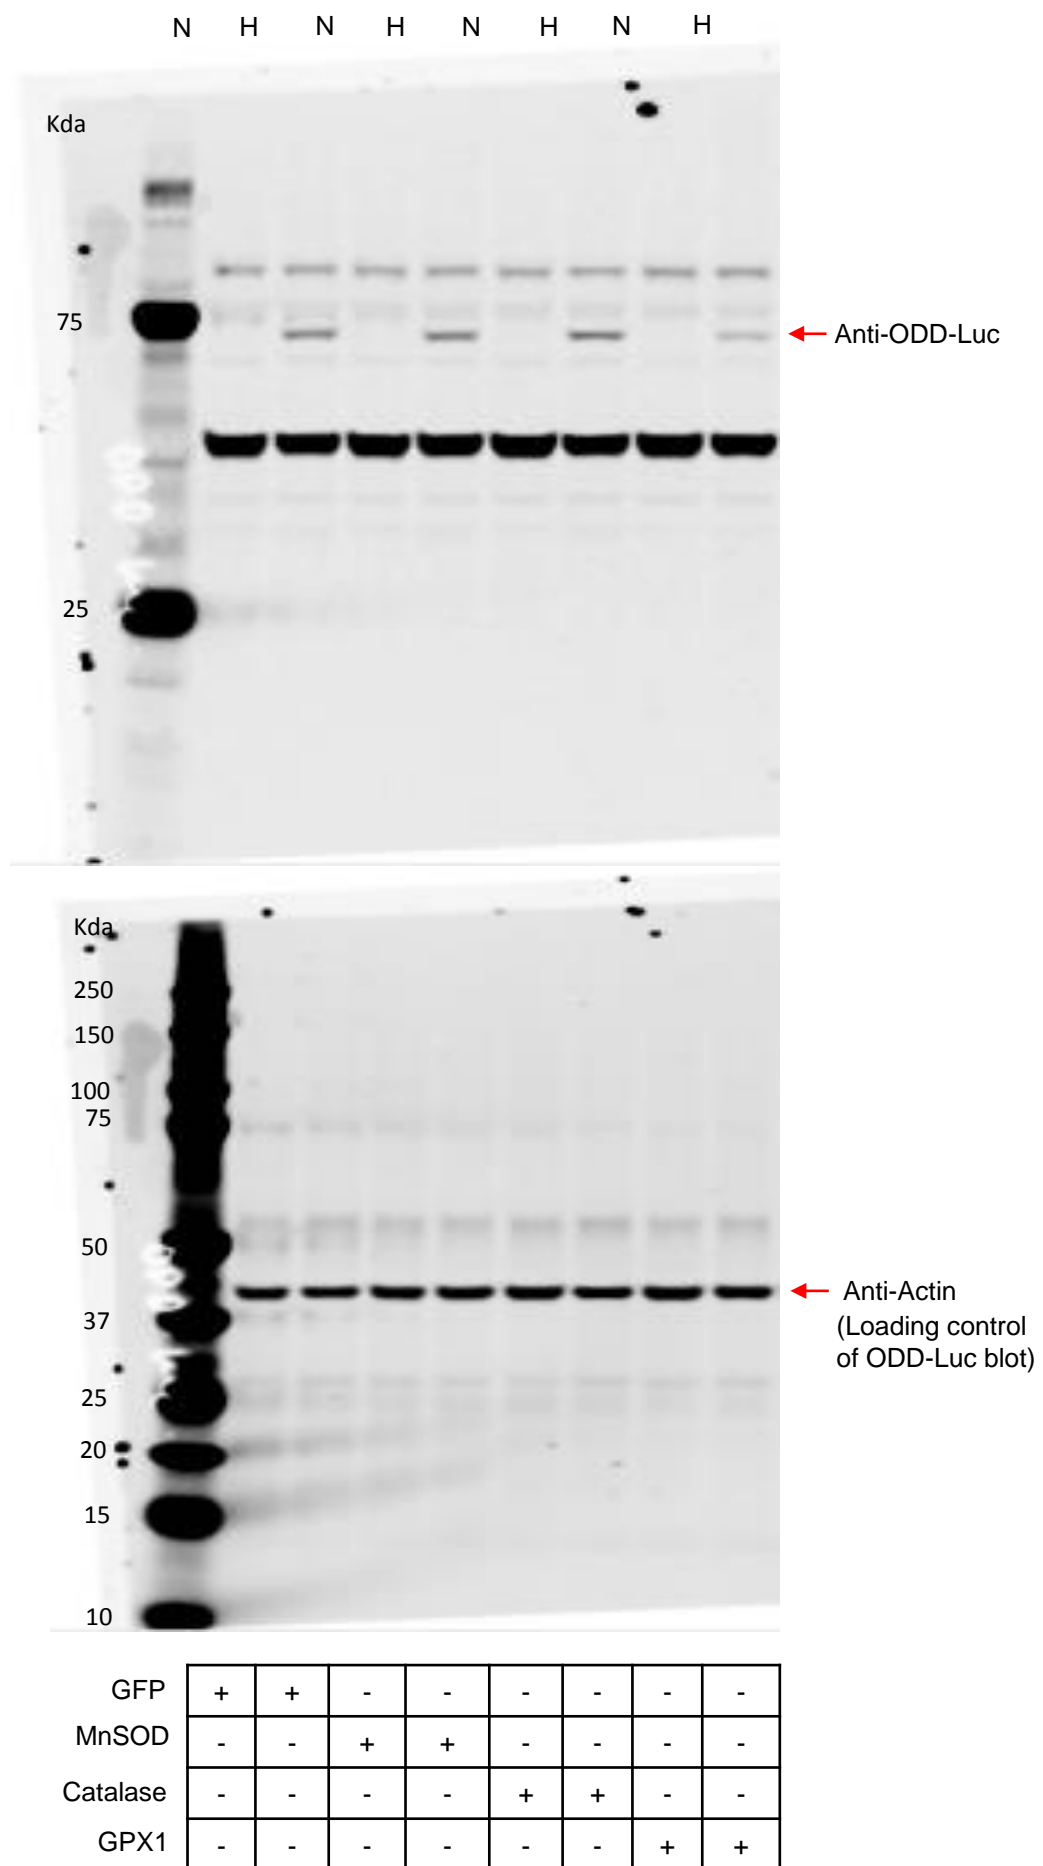

**Figure 3C**

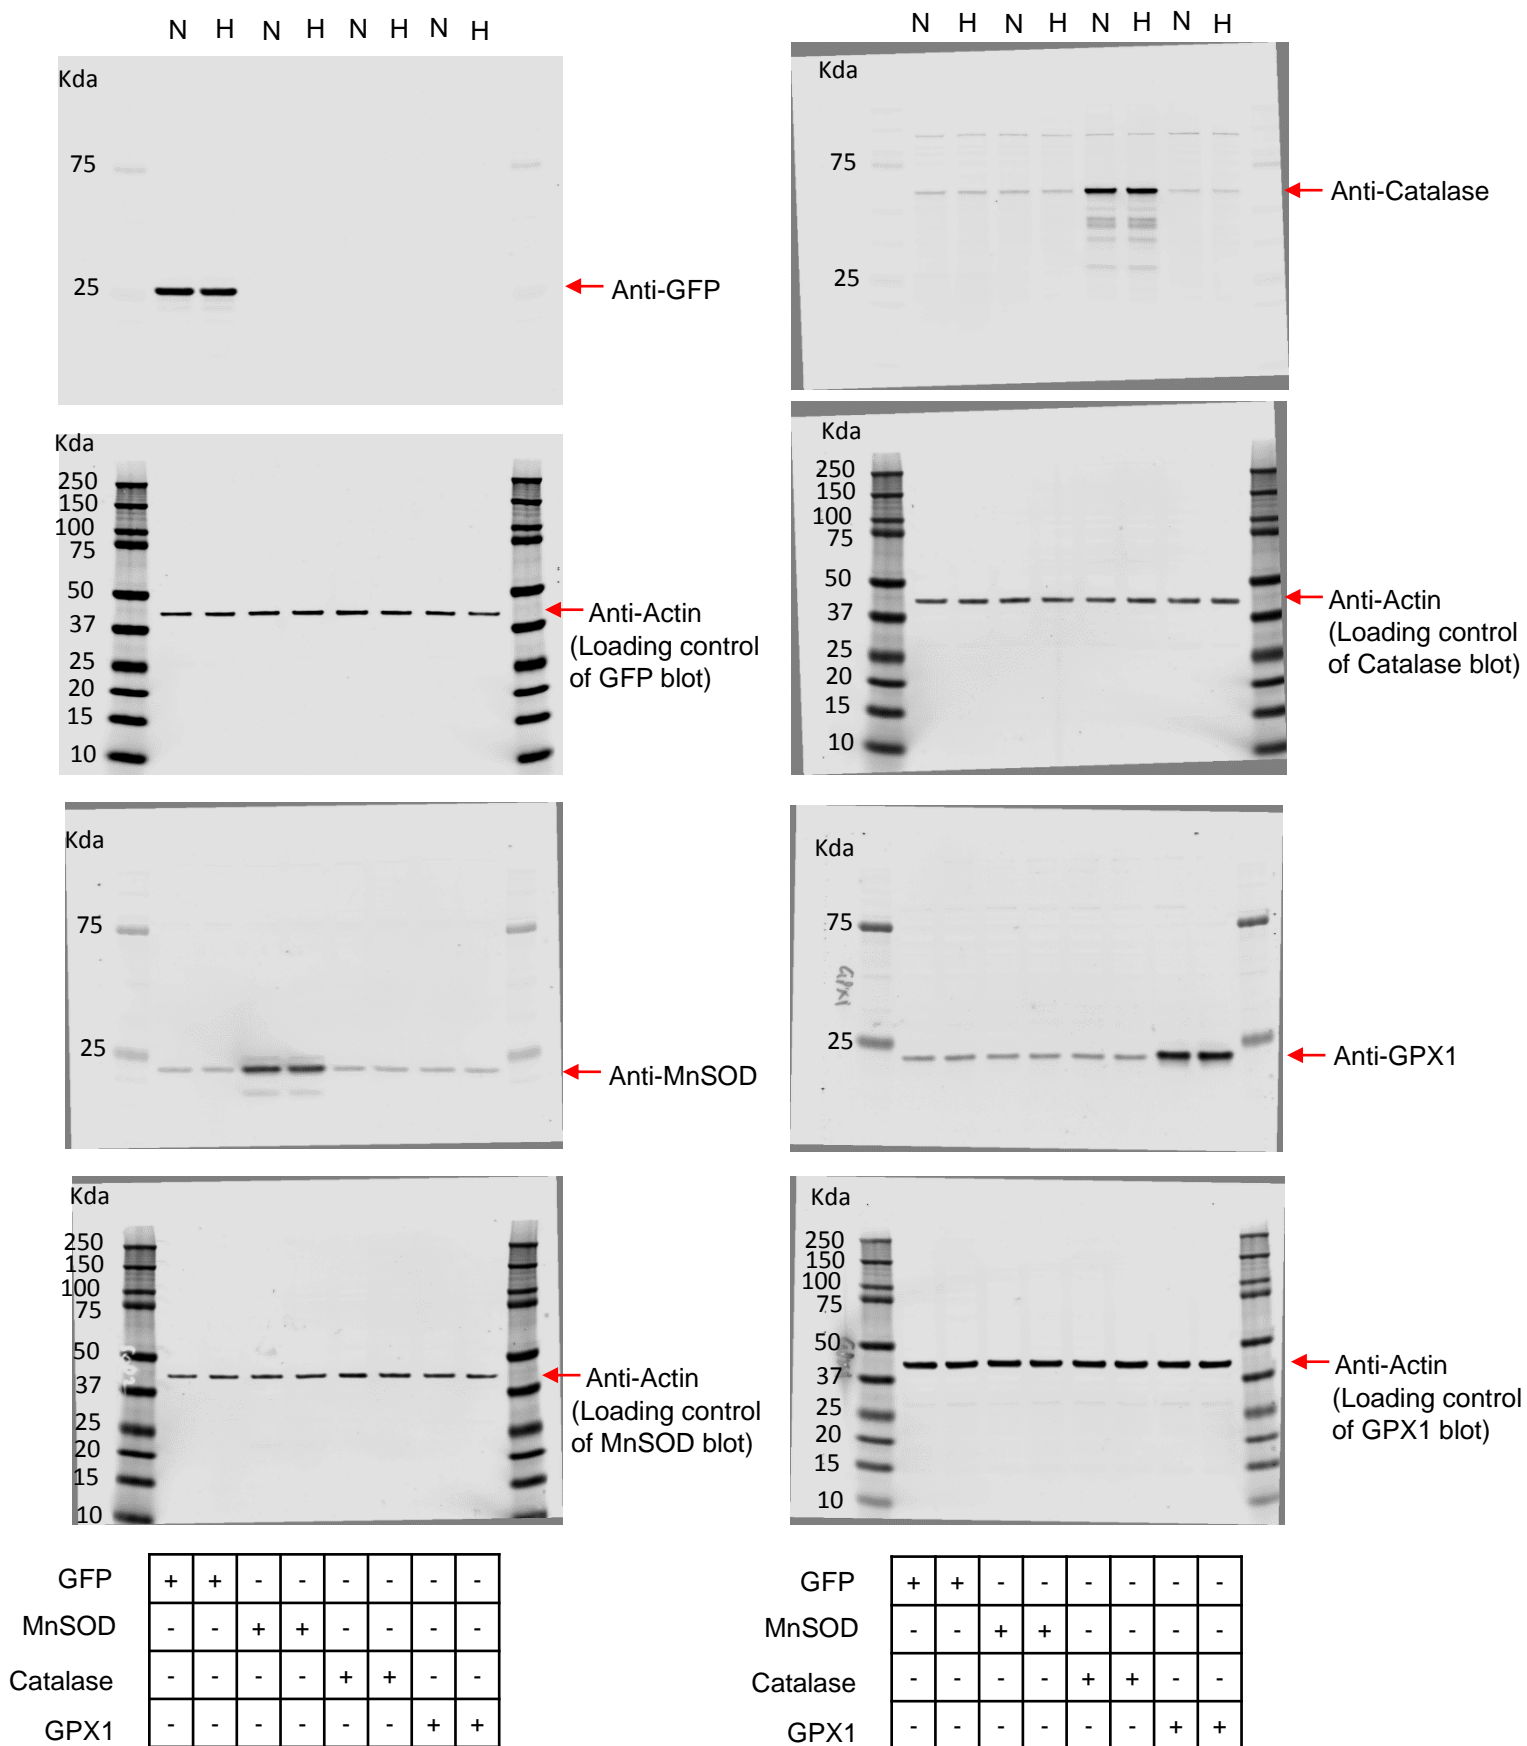

**Figure 3C**

Supplement: fig3-data1 [file Figure 3 - source data 1.pdf › Figure 3 - source data 1/Figure 3 - source data 1.pdf]

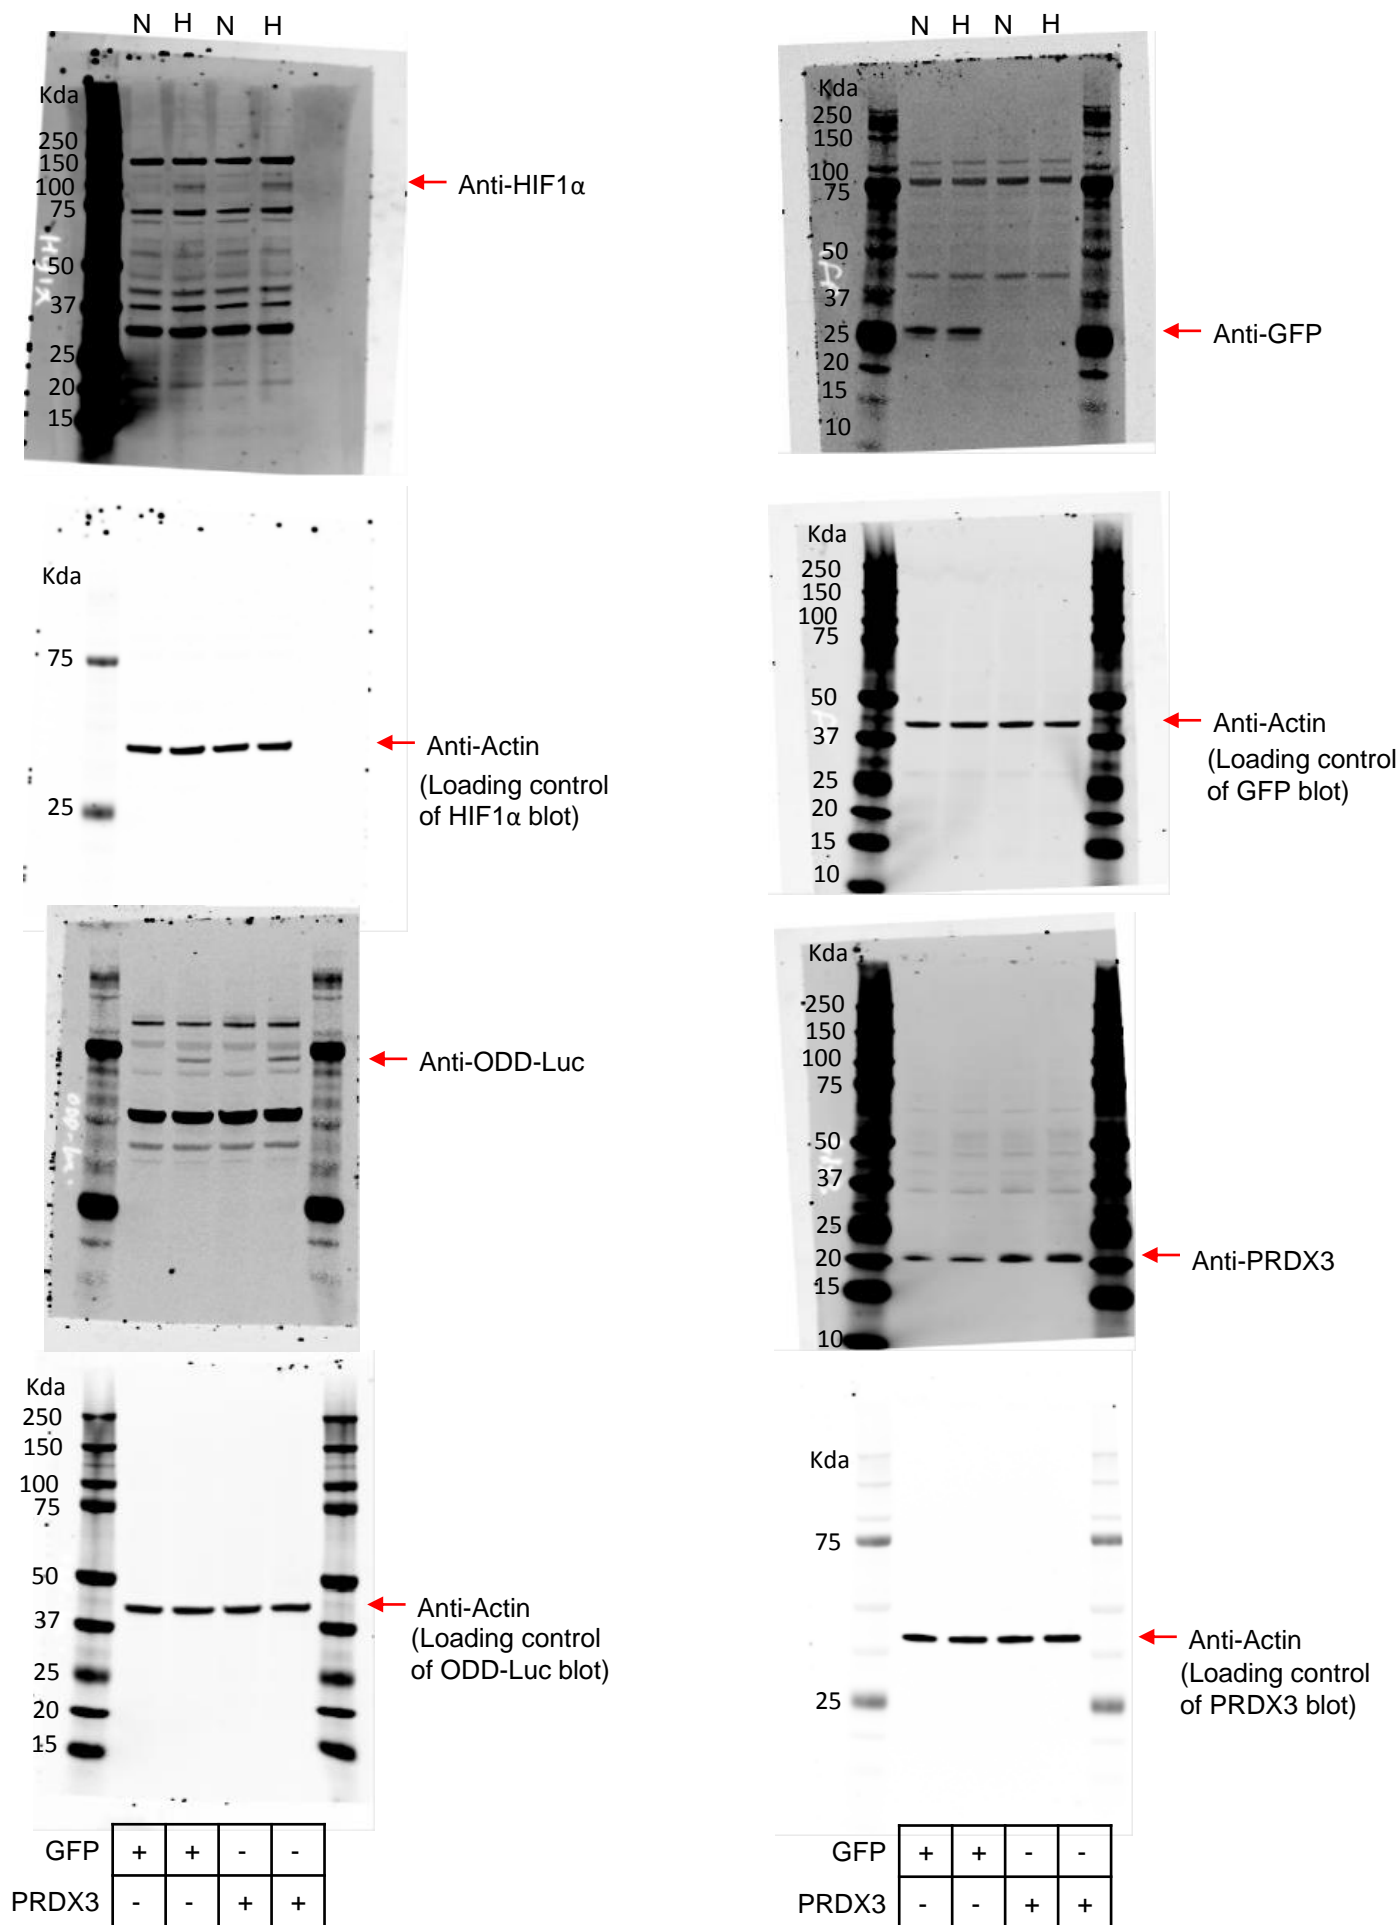

**Figure 3F**

Supplement: fig3-data2 [file Figure 3 - source data 2.pdf › Figure 3 - source data 2/Figure 3 - source data 2.pdf]

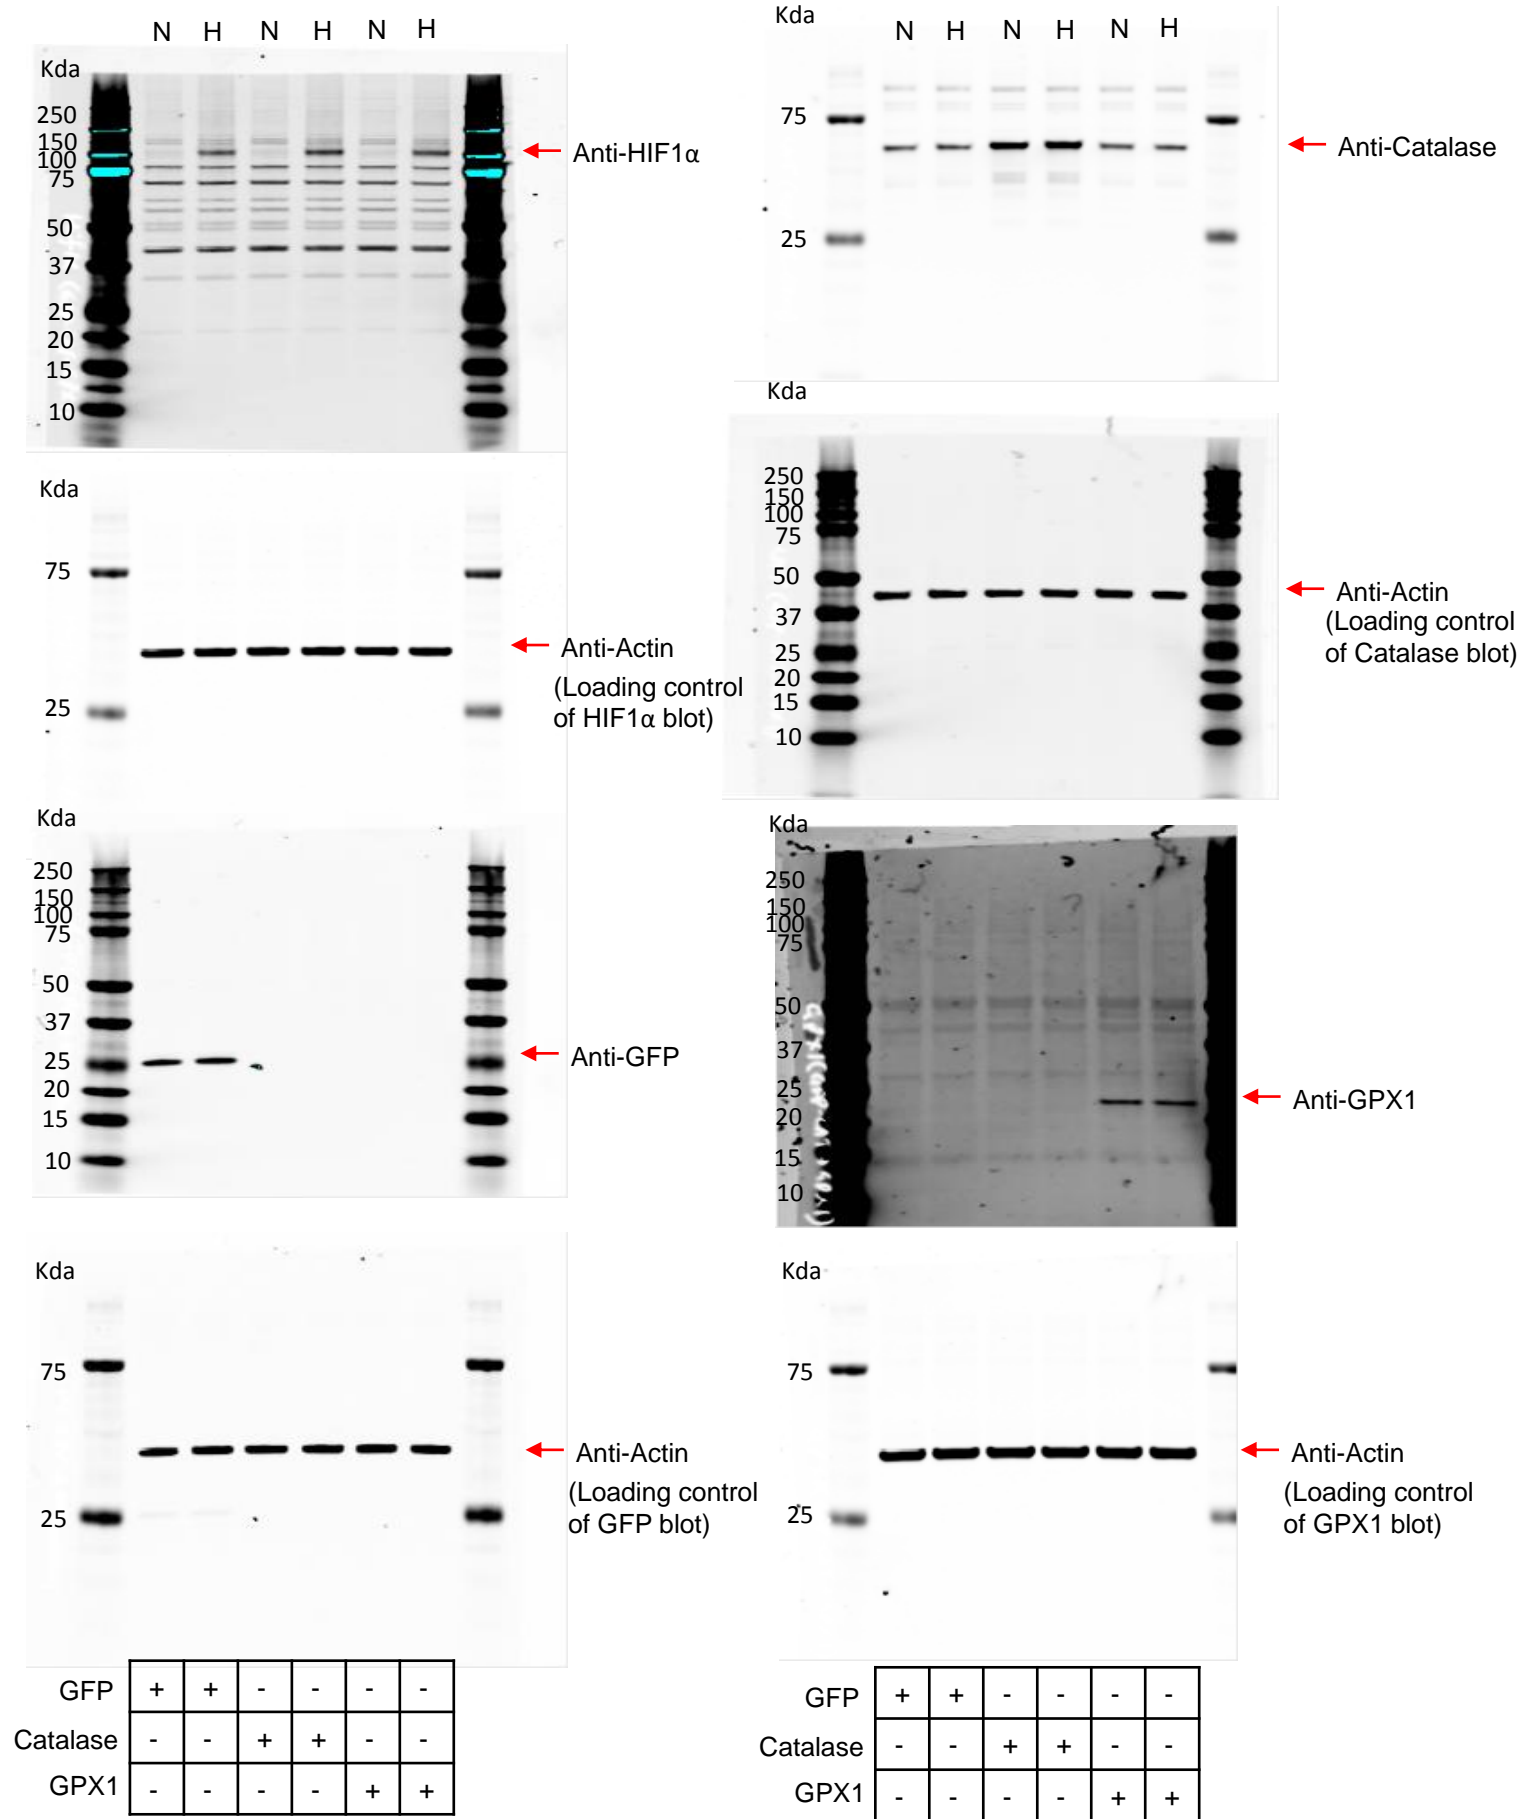

**Figure S6A**

Supplement: fig3-figsupp4-data1 [file elife-72873-fig3-figsupp4-data1-v2.zip]

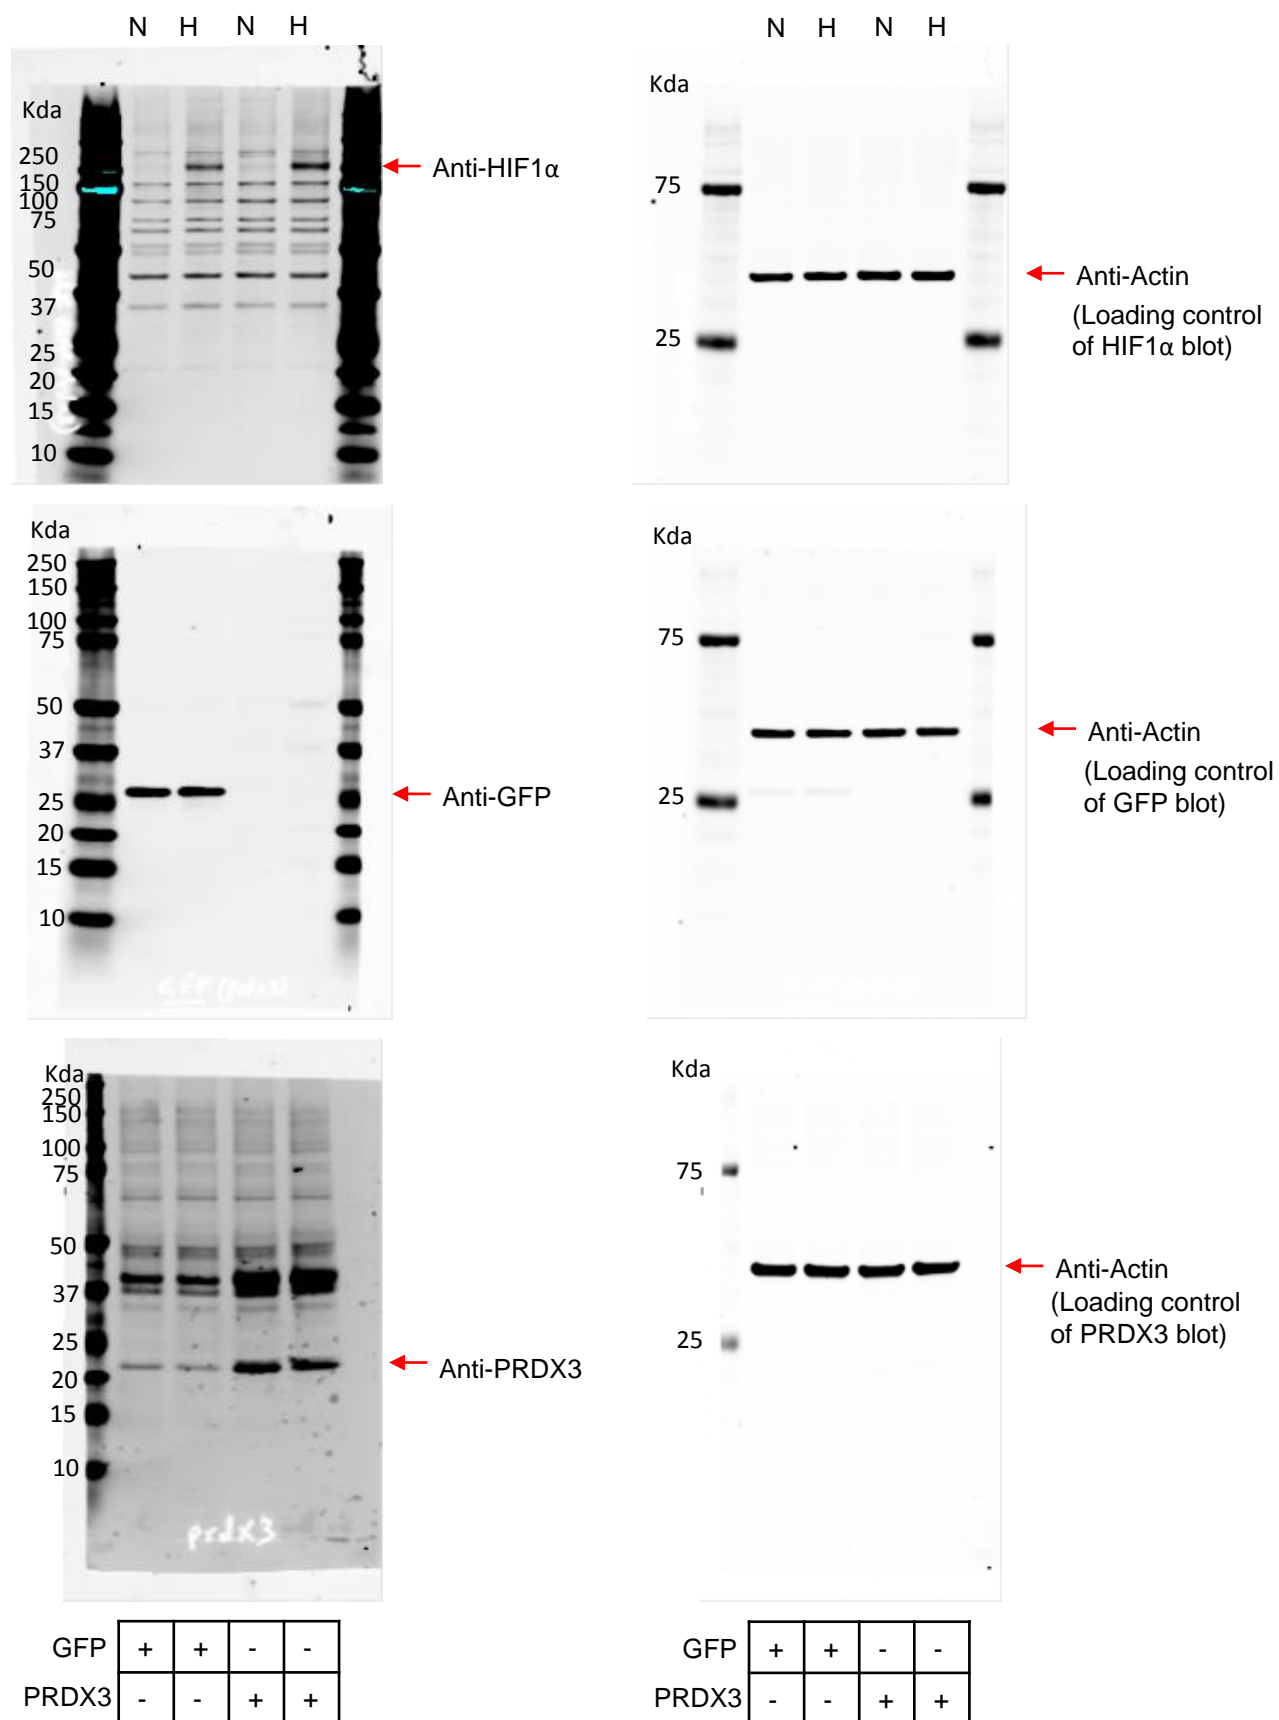

**Figure S6C**

Supplement: fig3-figsupp4-data2 [file Figure S6 - source data 2.pdf › Figure S6 - source data 2/Figure S6 - source data 2.pdf]

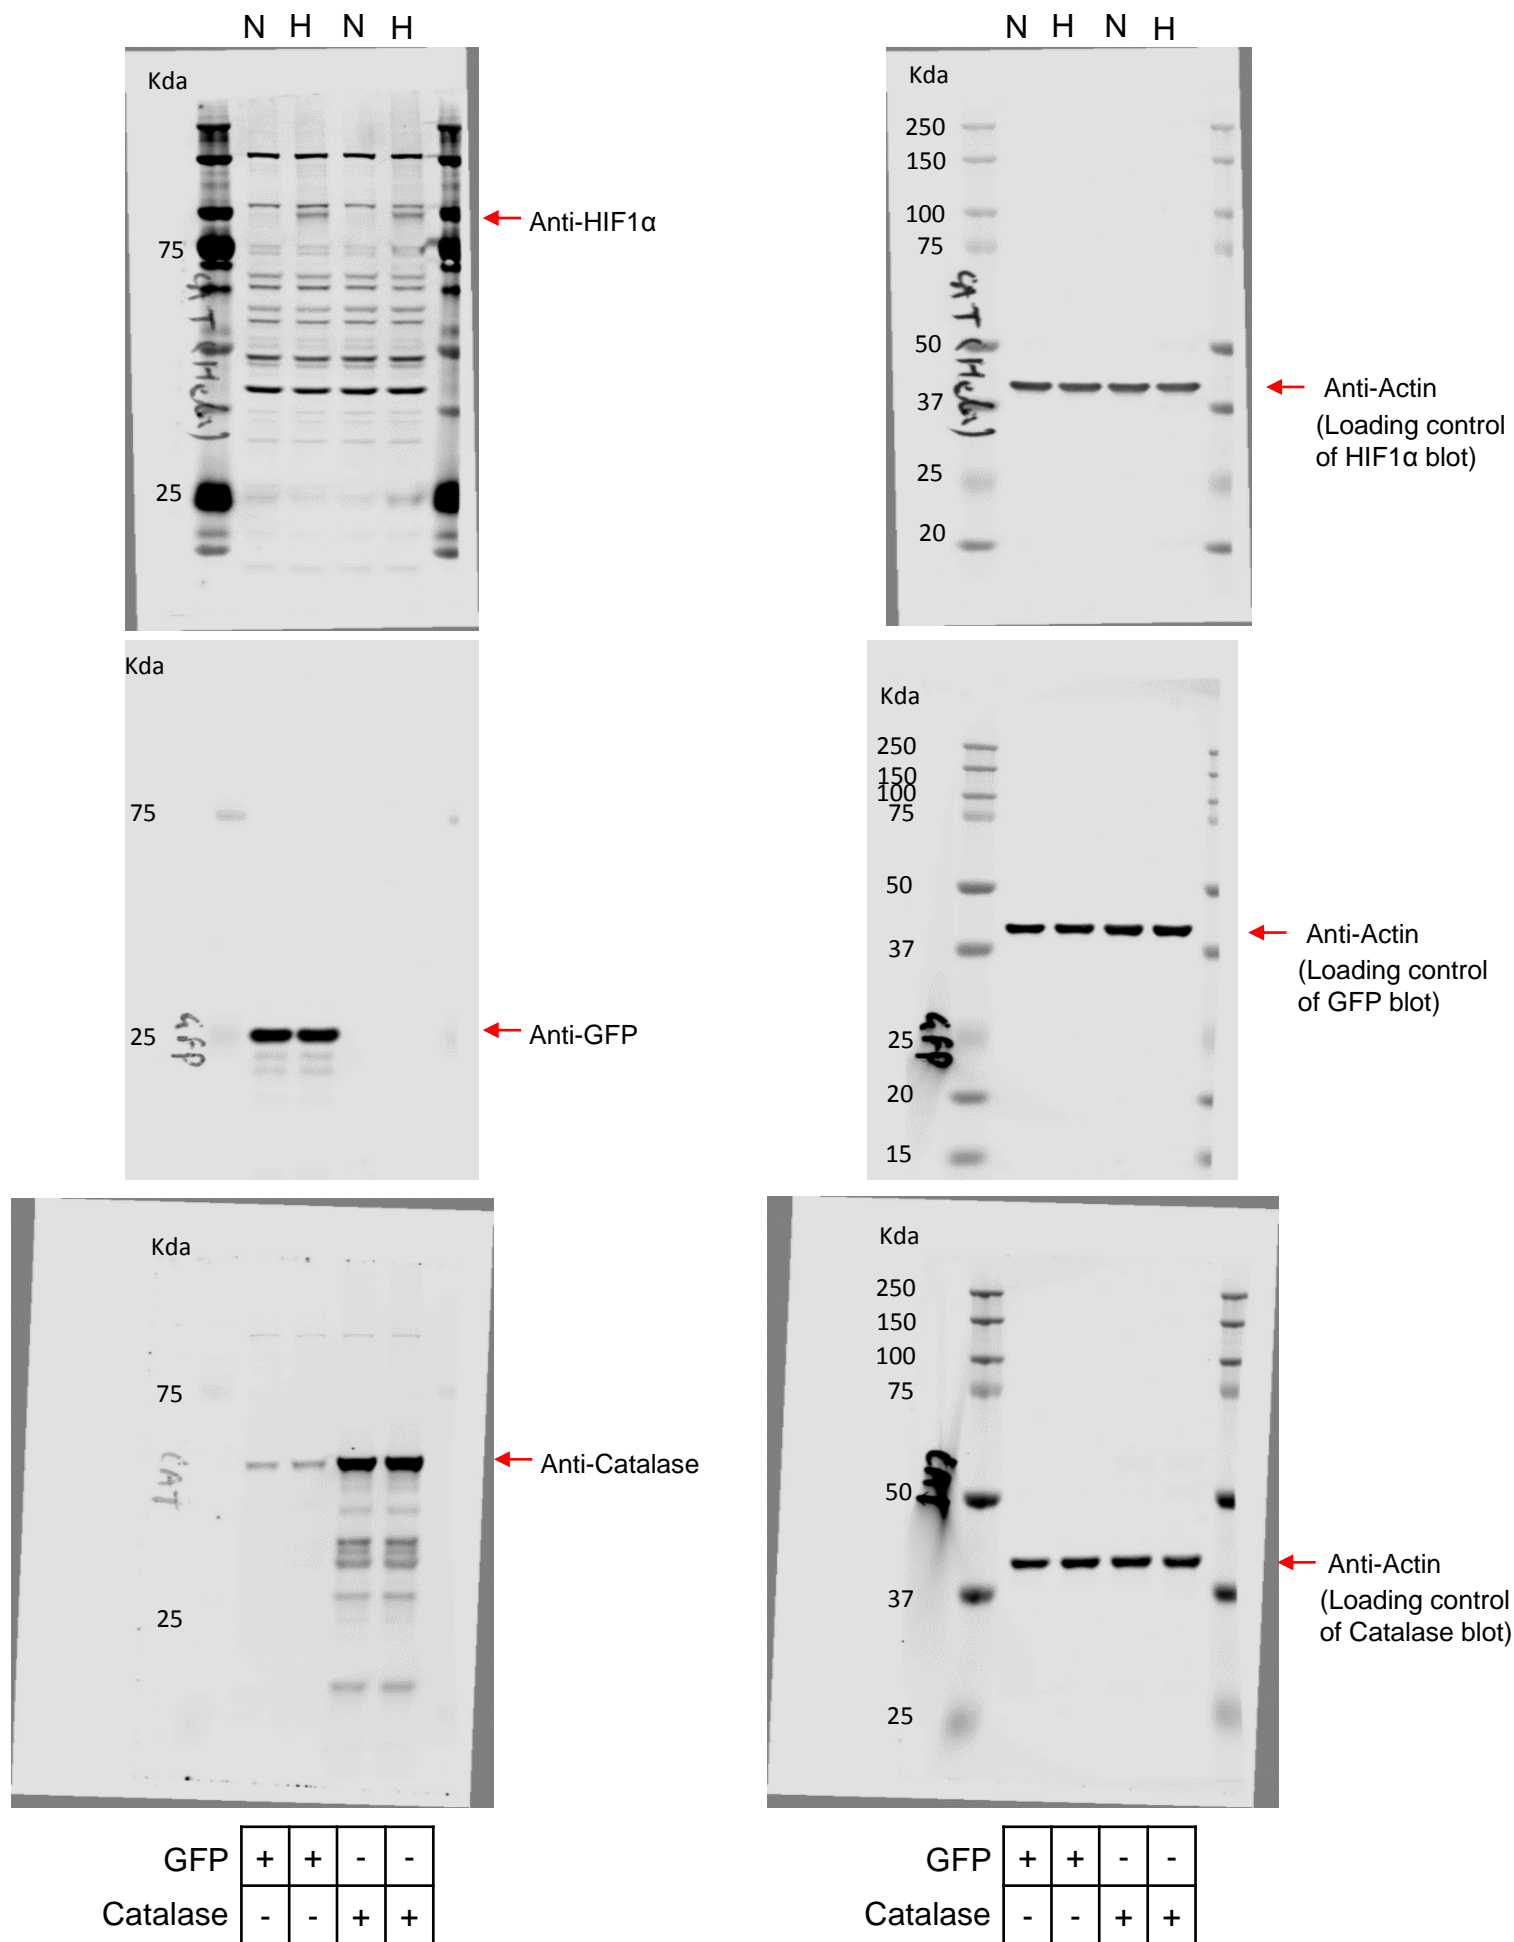

**Figure S7A**

Supplement: fig3-figsupp5-data1 [file elife-72873-fig3-figsupp5-data1-v2.zip]

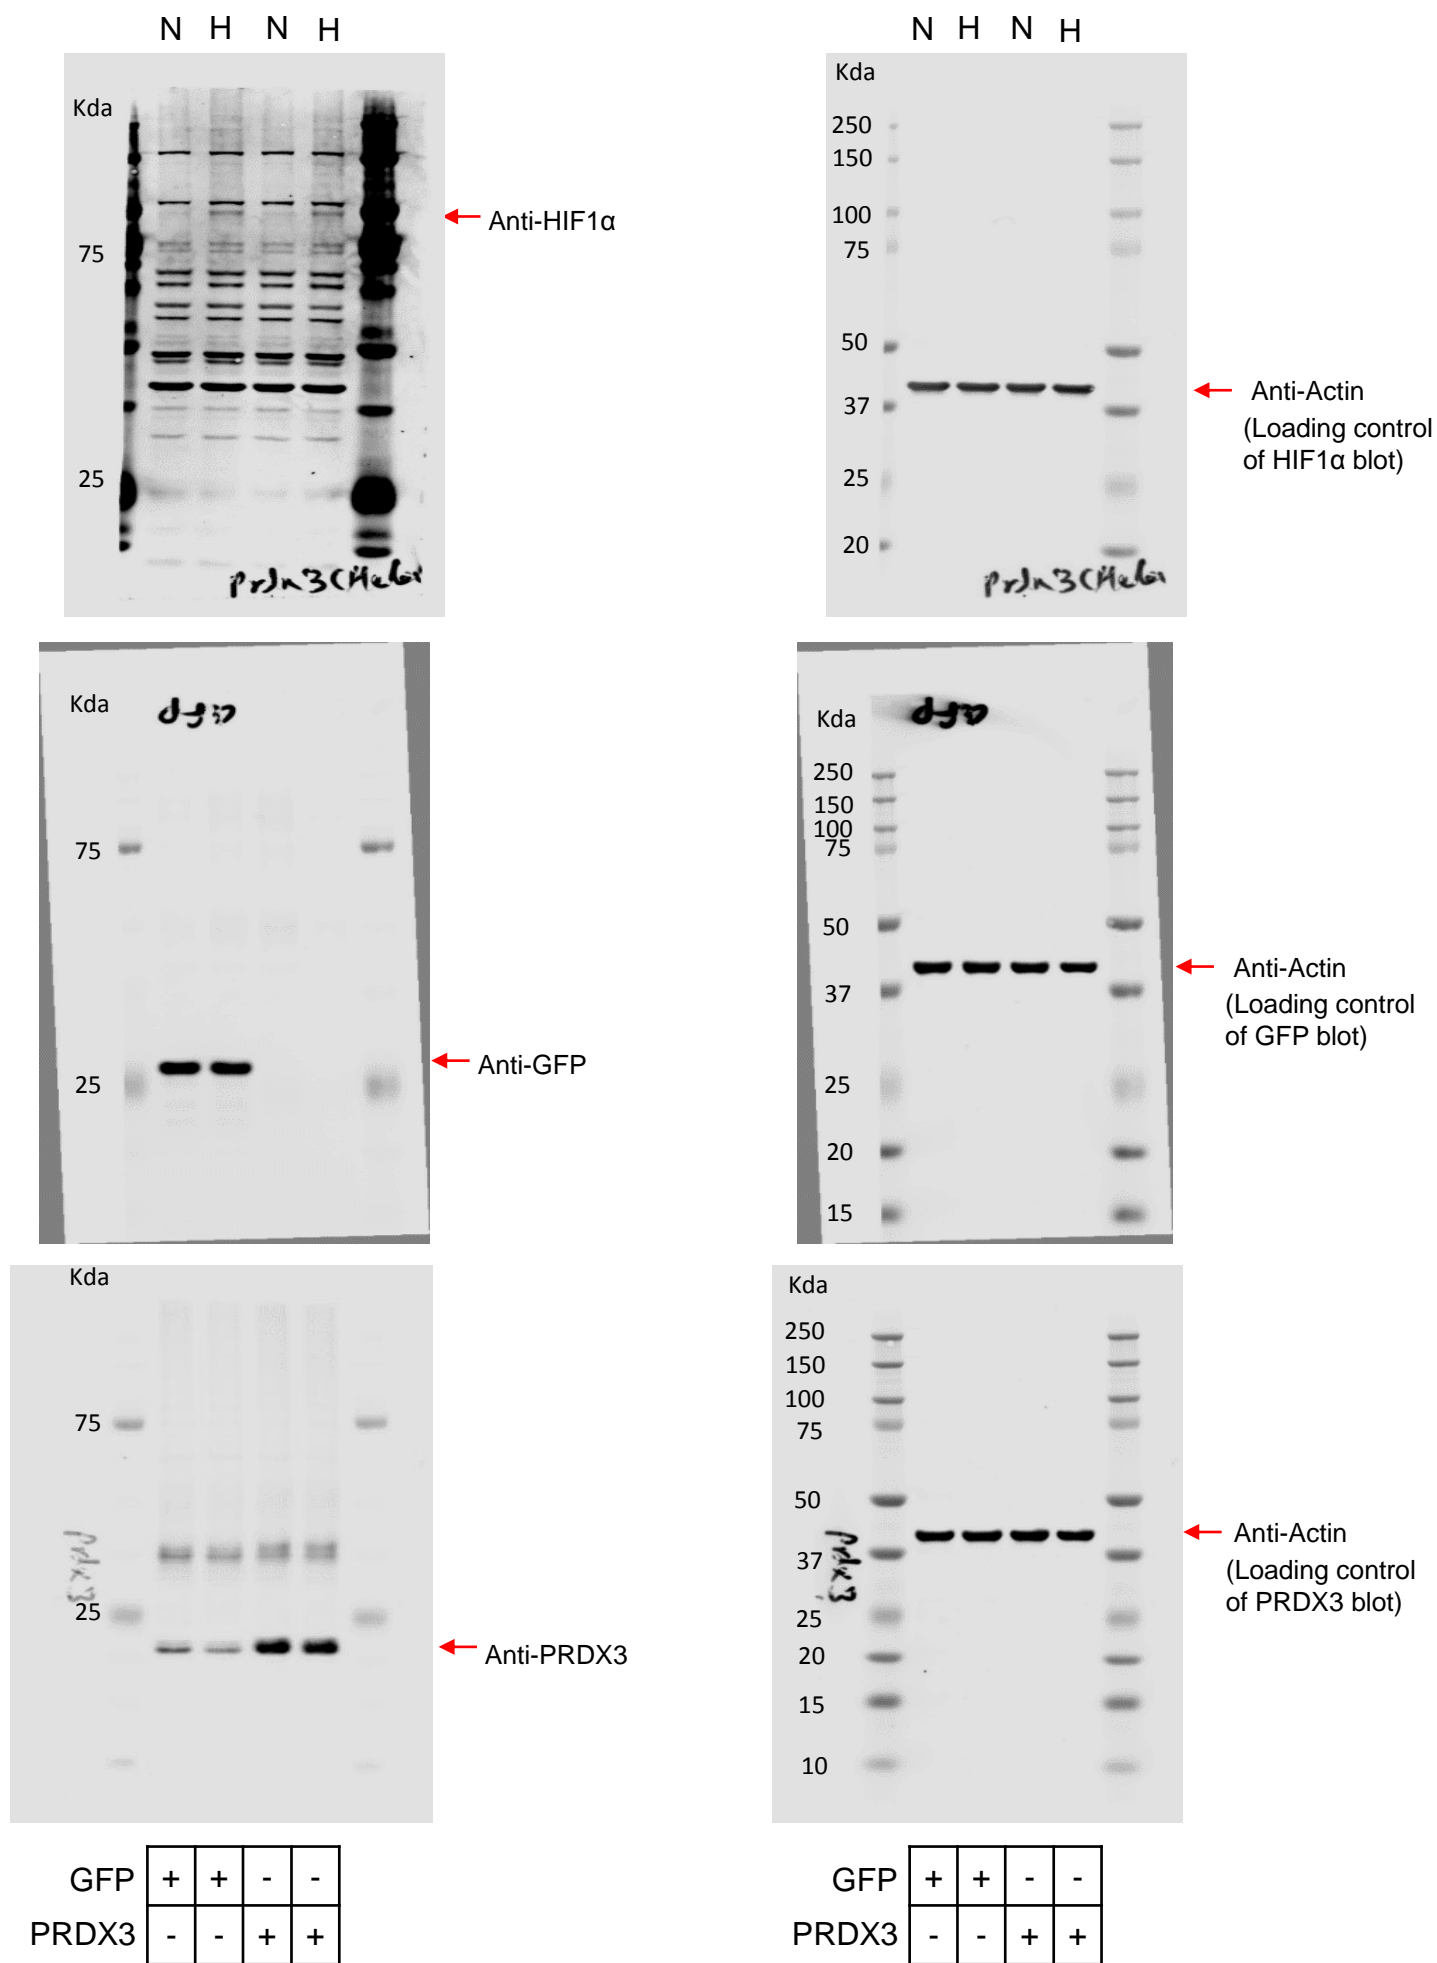

**Figure S7E**

Supplement: fig3-figsupp5-data2 [file Figure S7 - source data 2.pdf › Figure S7 - source data 2/Figure S7 - source data 2.pdf]

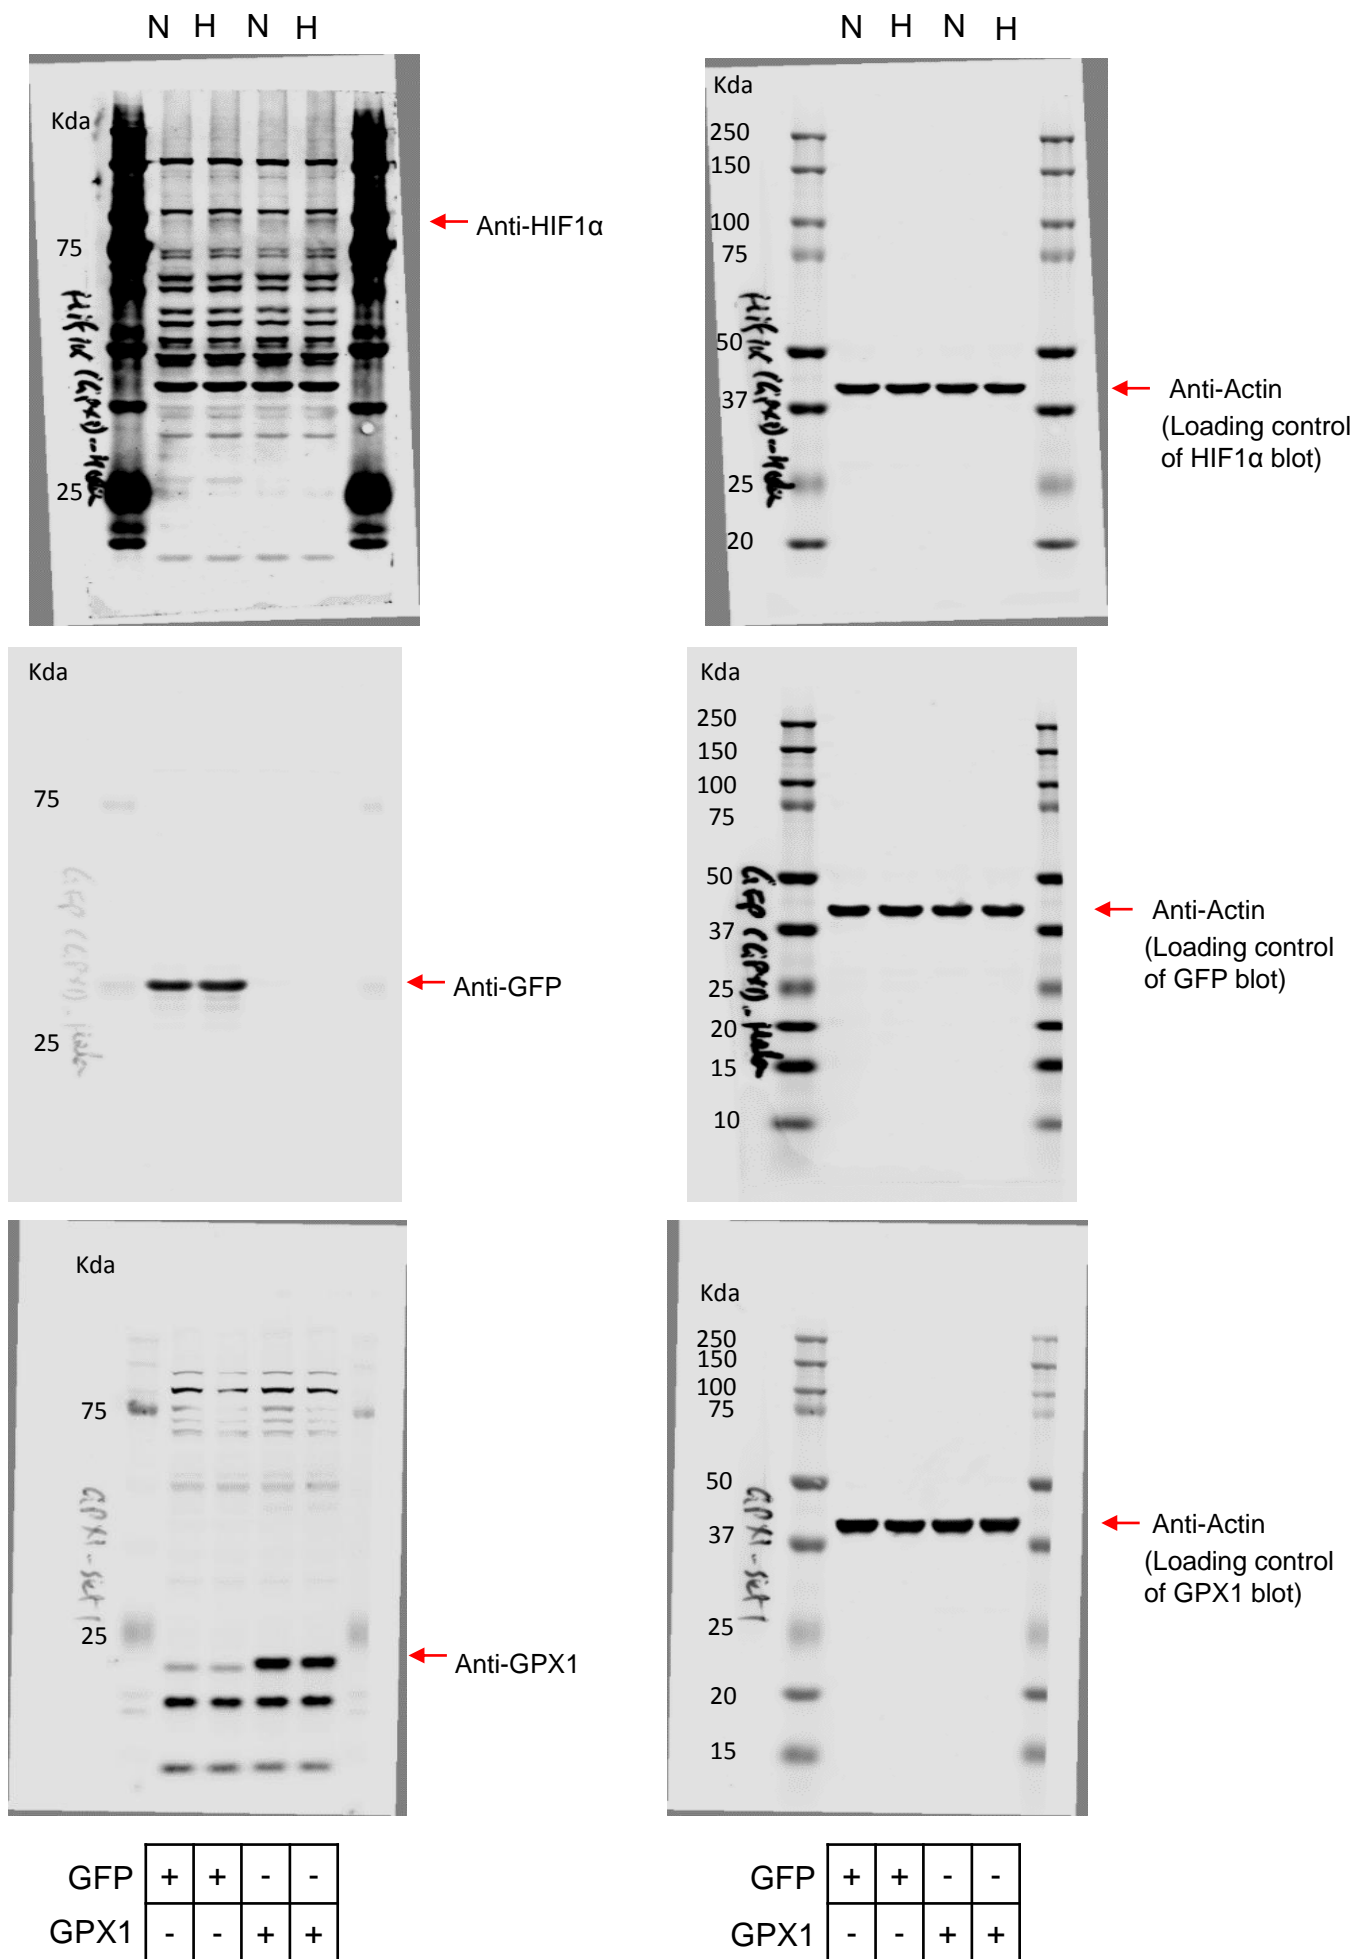

**Figure S7I**

Supplement: fig3-figsupp5-data3 [file elife-72873-fig3-figsupp5-data3-v2.zip]

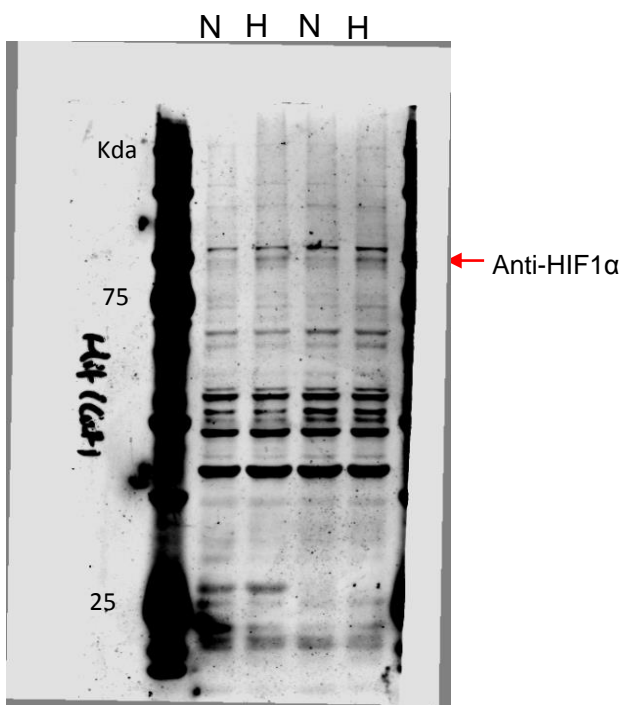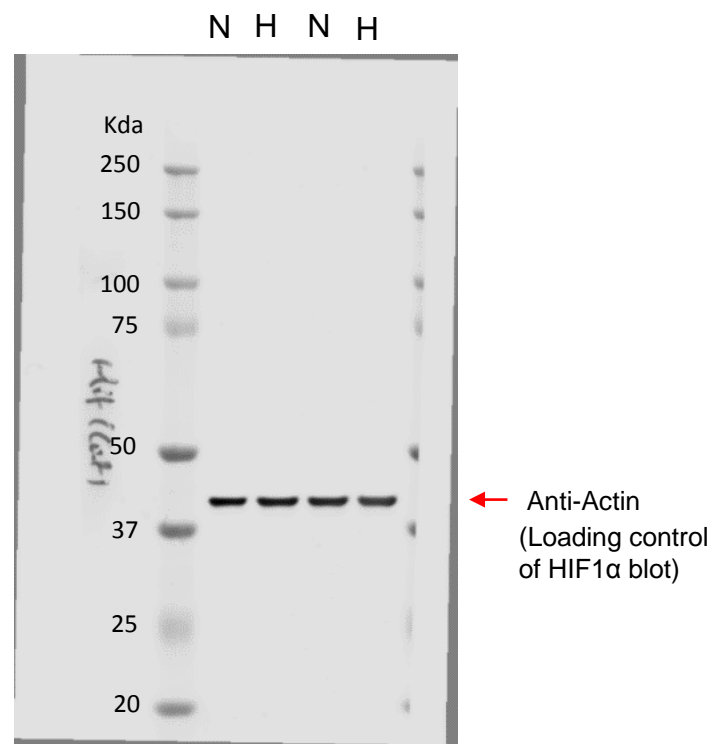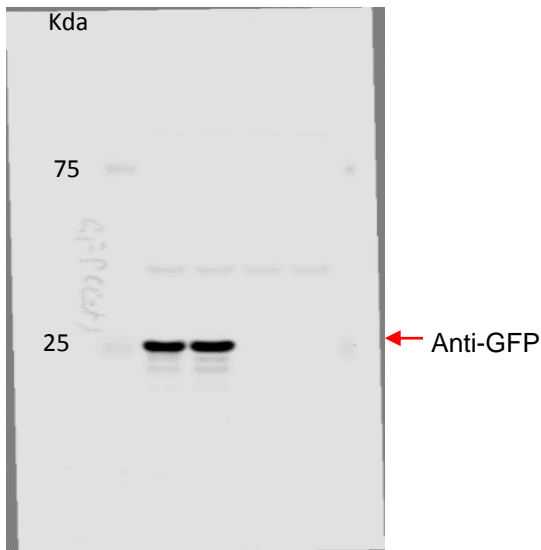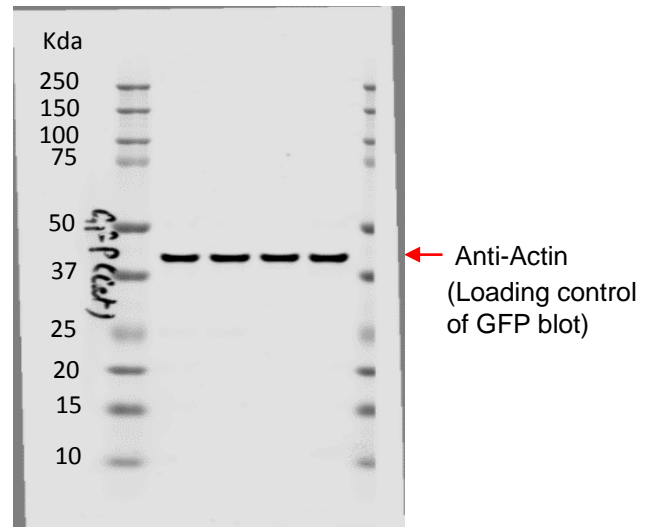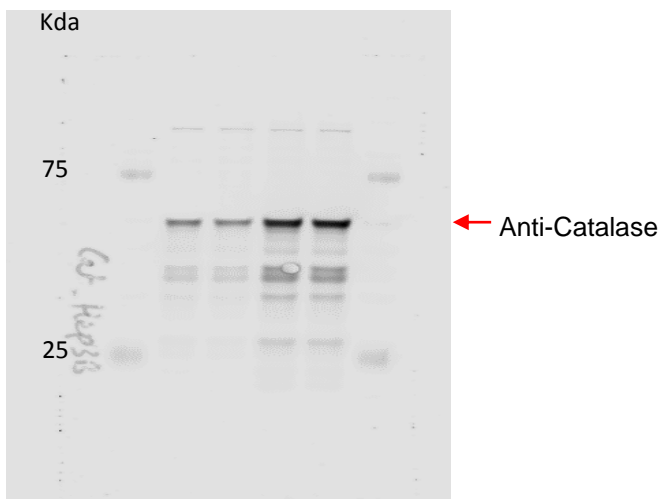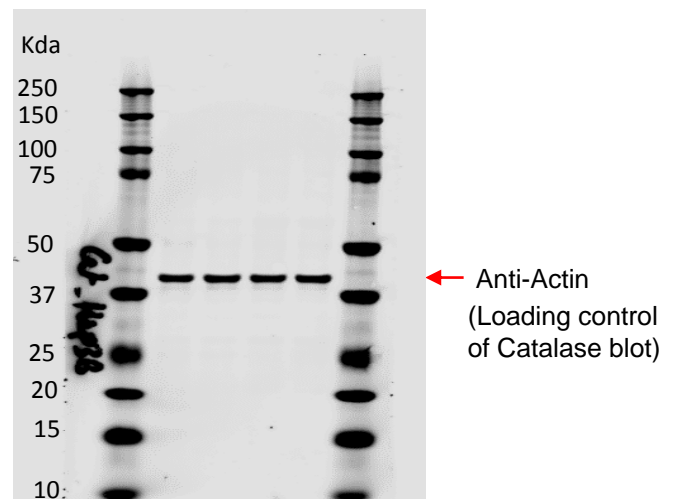

|          |   |   |   |   |
|----------|---|---|---|---|
| GFP      | + | + | - | - |
| Catalase | - | - | + | + |

|          |   |   |   |   |
|----------|---|---|---|---|
| GFP      | + | + | - | - |
| Catalase | - | - | + | + |

**Figure S8A**

Supplement: fig3-figsupp6-data1 [file elife-72873-fig3-figsupp6-data1-v2.zip]

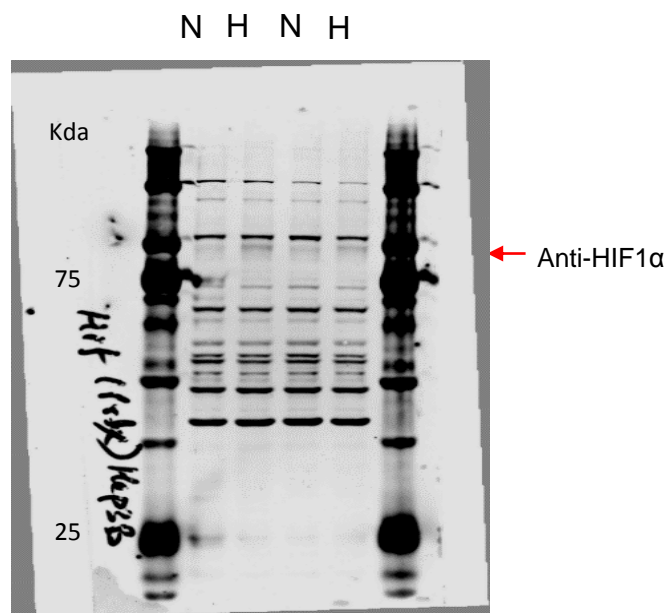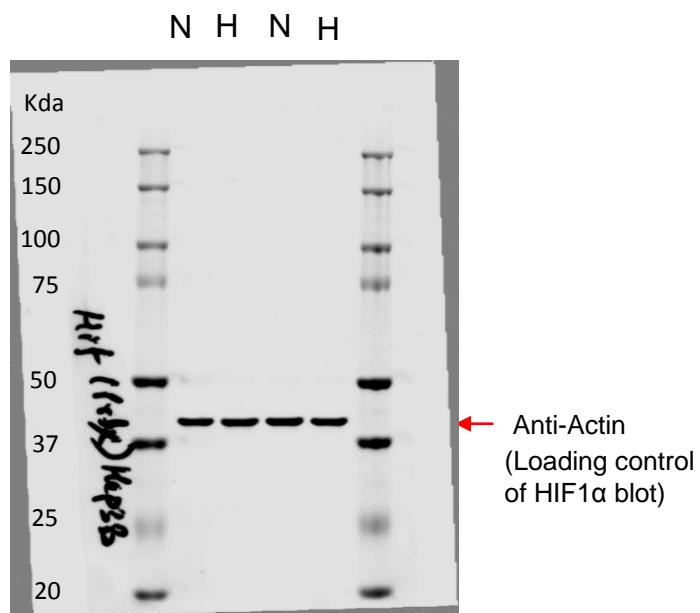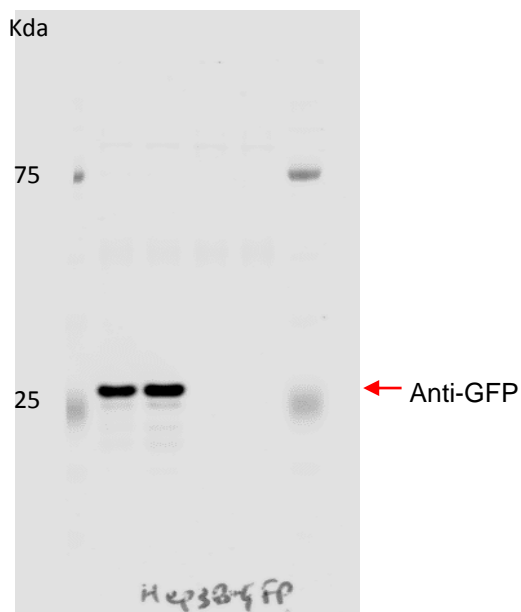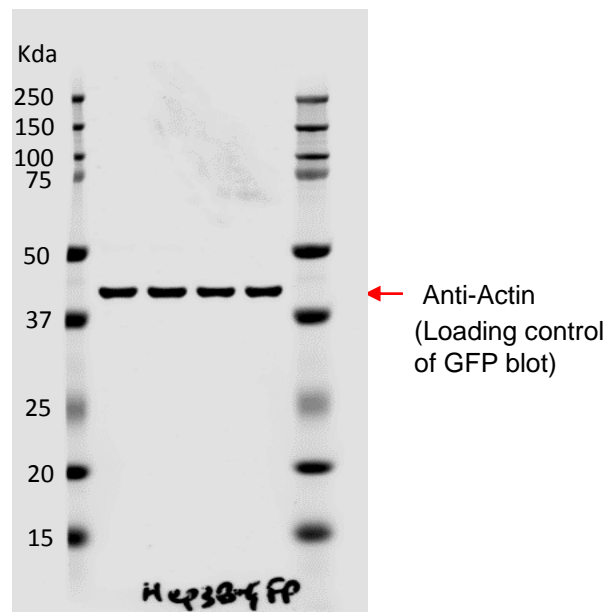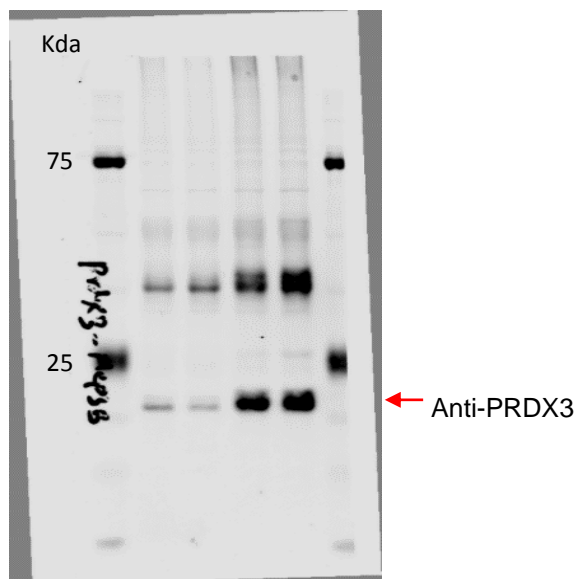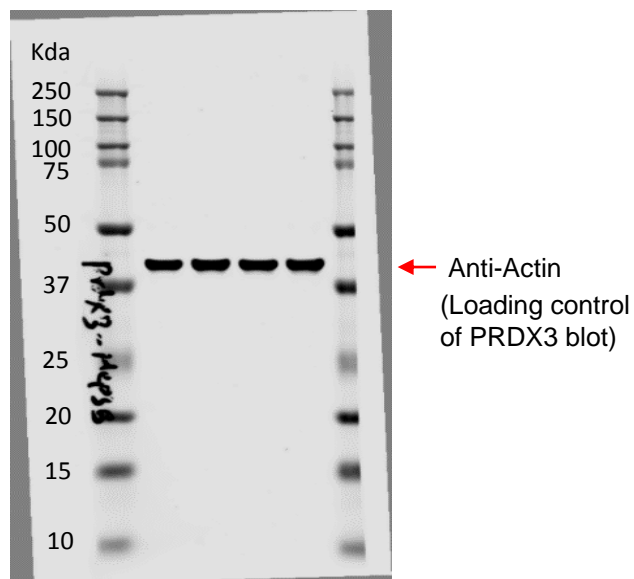

|       |   |   |   |   |
|-------|---|---|---|---|
| GFP   | + | + | - | - |
| PRDX3 | - | - | + | + |

|       |   |   |   |   |
|-------|---|---|---|---|
| GFP   | + | + | - | - |
| PRDX3 | - | - | + | + |

Figure S8E

Supplement: fig3-figsupp6-data2 [file elife-72873-fig3-figsupp6-data2-v2.zip]

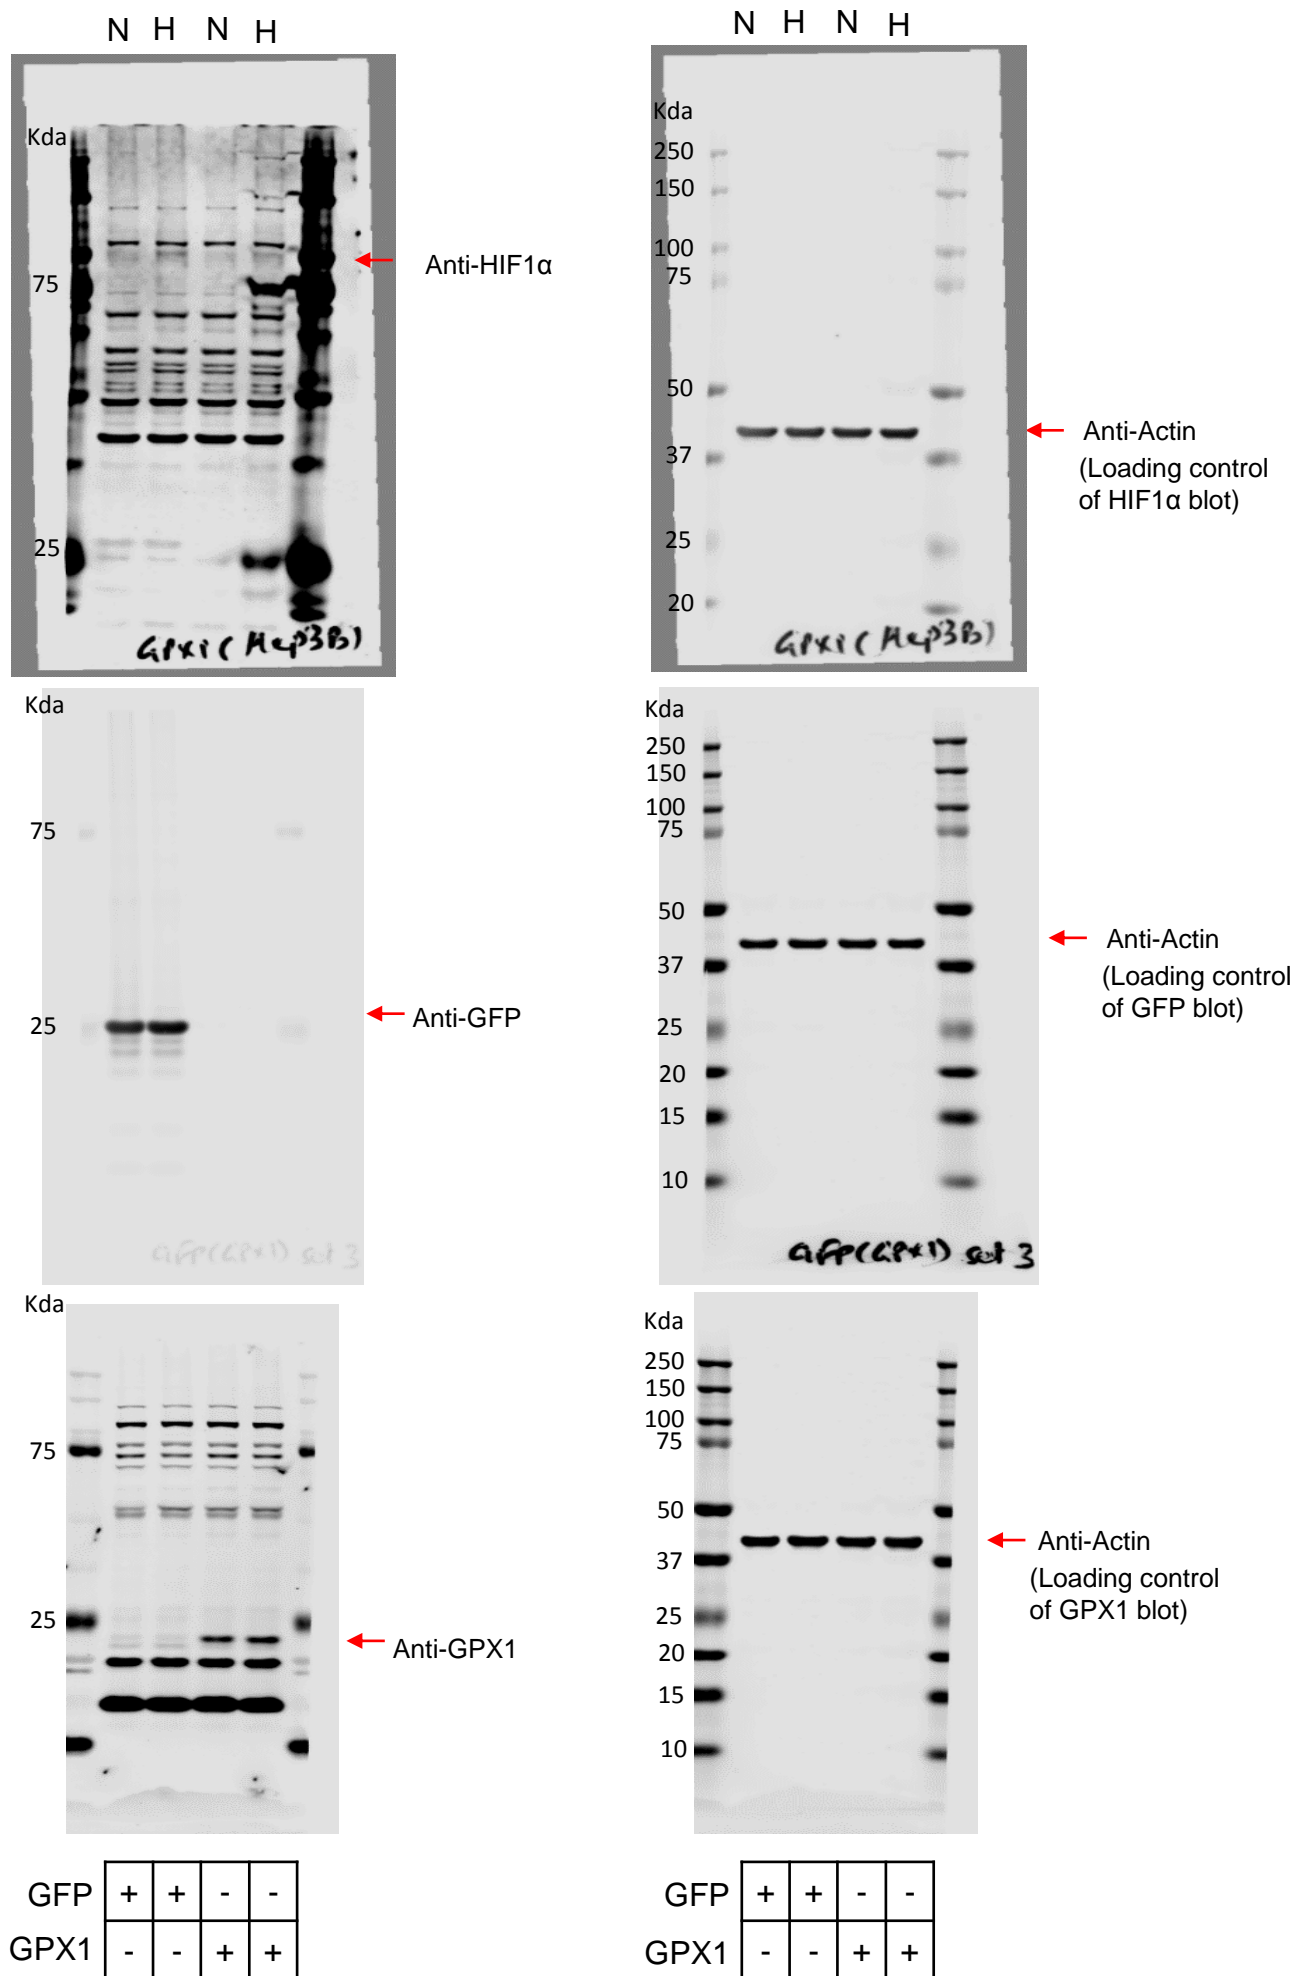

**Figure S8I**

Supplement: fig3-figsupp6-data3 [file elife-72873-fig3-figsupp6-data3-v2.zip]

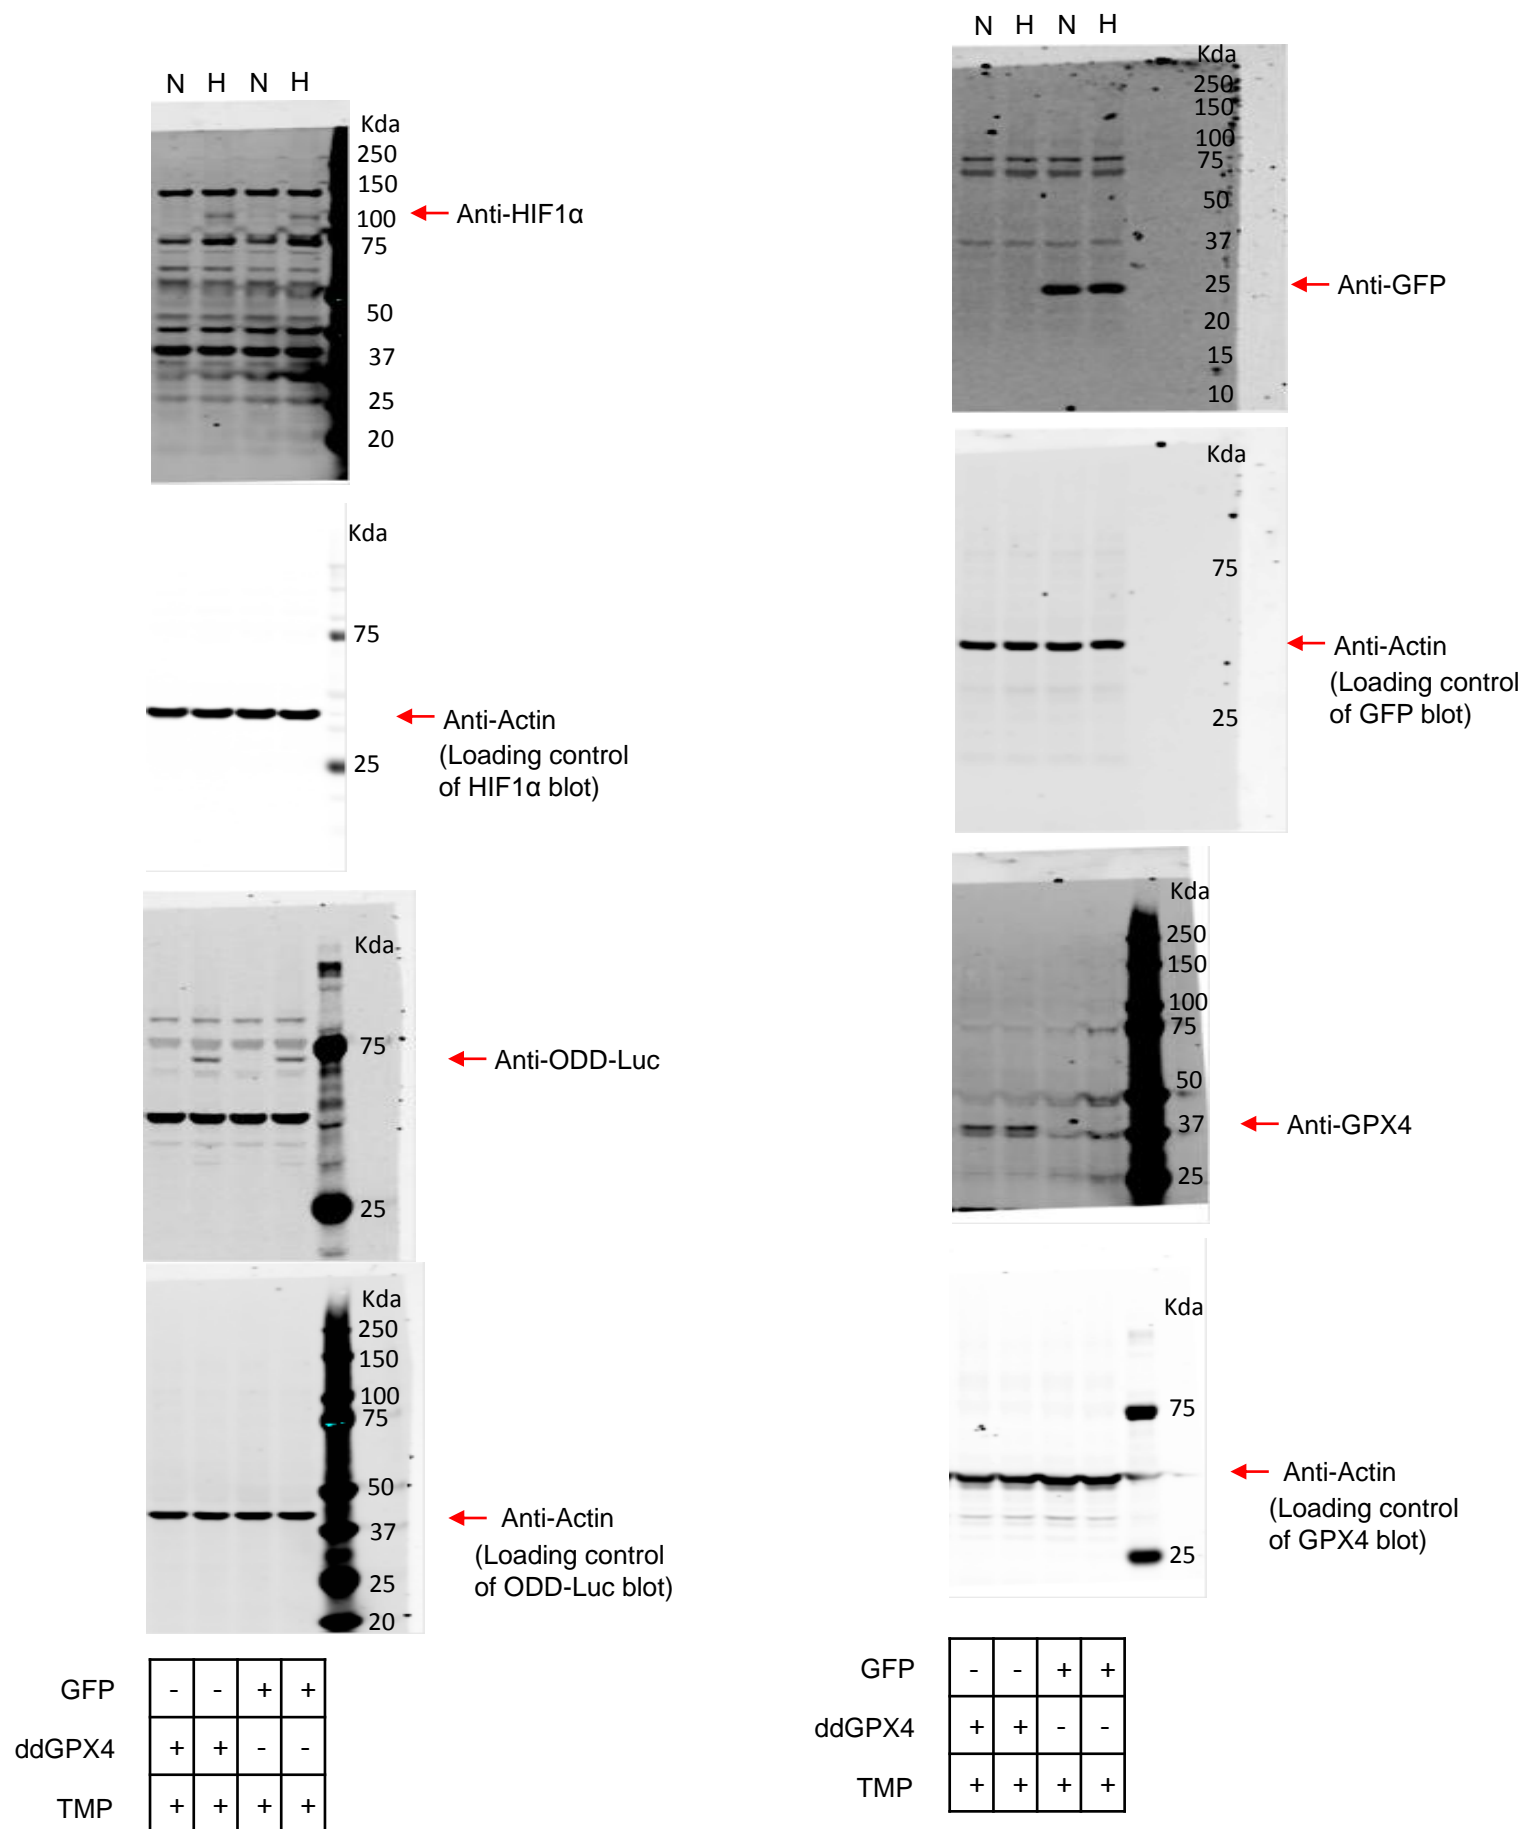

**Figure 6D**

Supplement: fig5-data1 [file elife-72873-fig5-data1-v2.zip]
